# Supplementary material for: Facile Access to Solifenacin Impurity K: One-Step Synthesis and an HPLC-MS Method for Its Determination
Source: Preprints.org preprint supplement (doi:10.20944/preprints202405.1473.v1), 2024-05-22

**SUPPLEMENTARY MATERIAL FOR**

Facile Access to Solifenacin Impurity K: One-Step Synthesis and an HPLC-MS method for its determination

Raúl Xifra1 and Andreea L. Turcu2,3*

1 Centro de investigación y desarrollo para la Química Orgánica S.L. (CIDQO, S. L.); Polígono Industrial “Can Verdalet”. Calle D; Nave 91, 08490 Tordera, Spain; rxifra@ewatts-tech.com

2 Laboratori de Química Farmacèutica (Unitat Associada al CSIC), Facultat de Farmàcia i Ciències de l’Alimentació, Universitat de Barcelona, Av. Joan XXIII, 27-31, 08028 Barcelona, Spain; aturcu@ub.edu

3 Institute of Biomedicine of the University of Barcelona (IBUB), Universitat de Barcelona, Barcelona, Spain.

**Table of contents**

**Figure S1**: 1H, 13C, DEPT, HSQC, COSY, IR GC/MS (EI),

and UV spectrum of Impurity K Page S3

**Figure S2:** HPLC/MS-MS of Solifenacin succinate tables Page S13

**Figure S3**: HPLC/MS-MS of Impurity I Page S15

**Figure S4:** HPLC/MS-MS of Impurity K Page S17


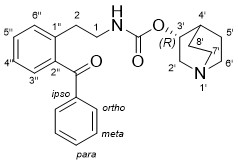
**1H, 13C, DEPT, HSQC, COSY, IR, GC/MS (EI) and UV spectrum of Impurity K**

1H (400 MHz, CDCl3)


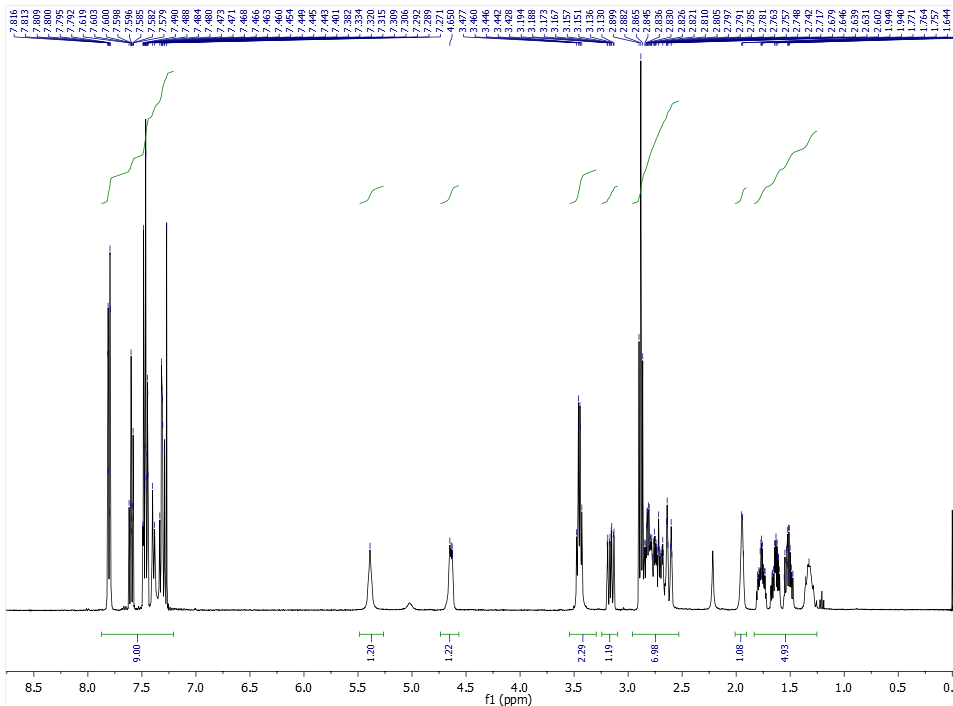

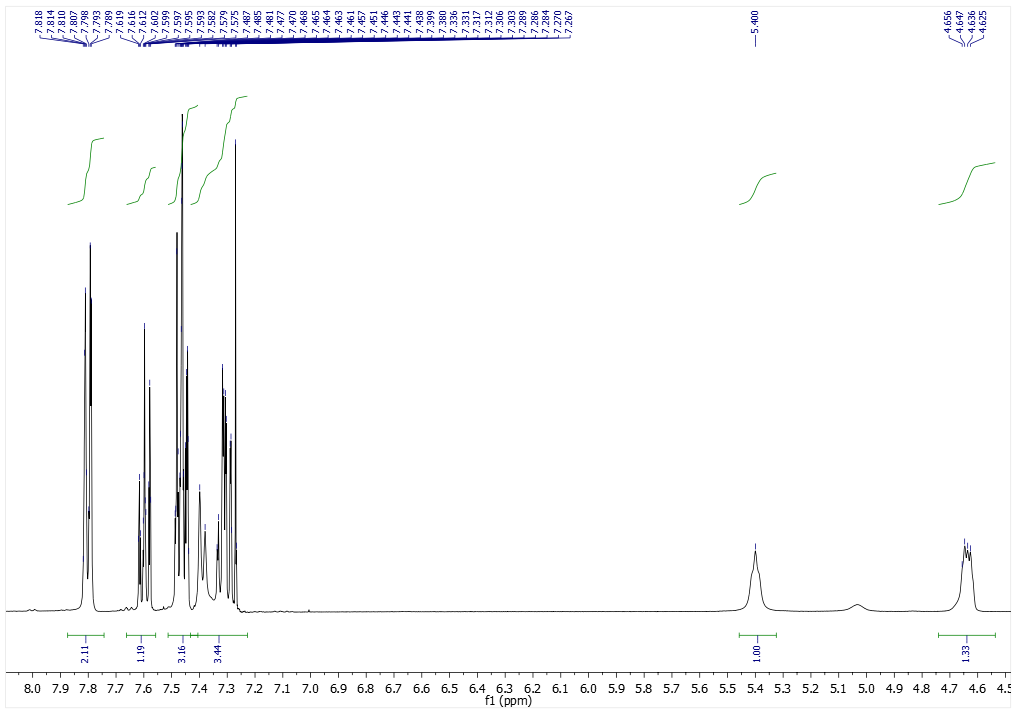


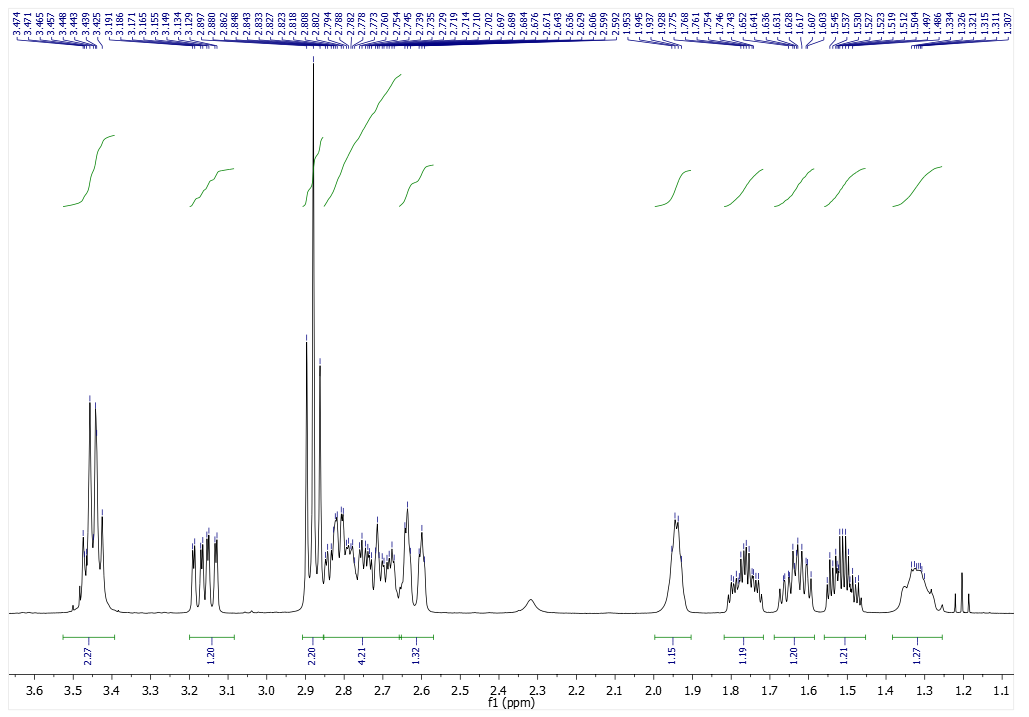


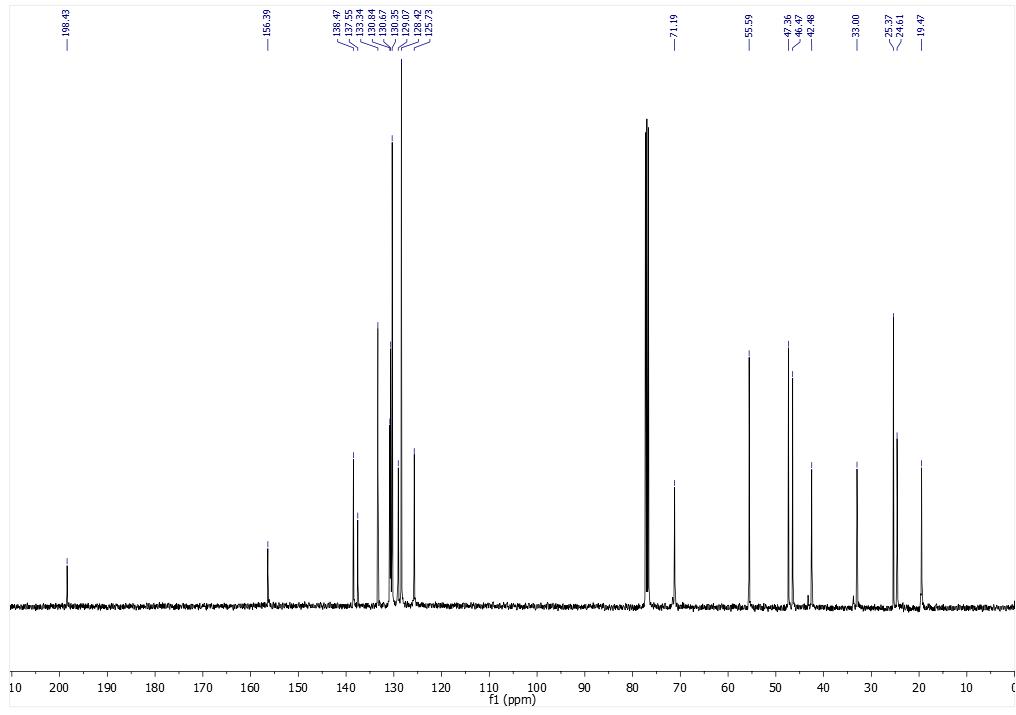
13C (100.16 MHz, CDCl3)


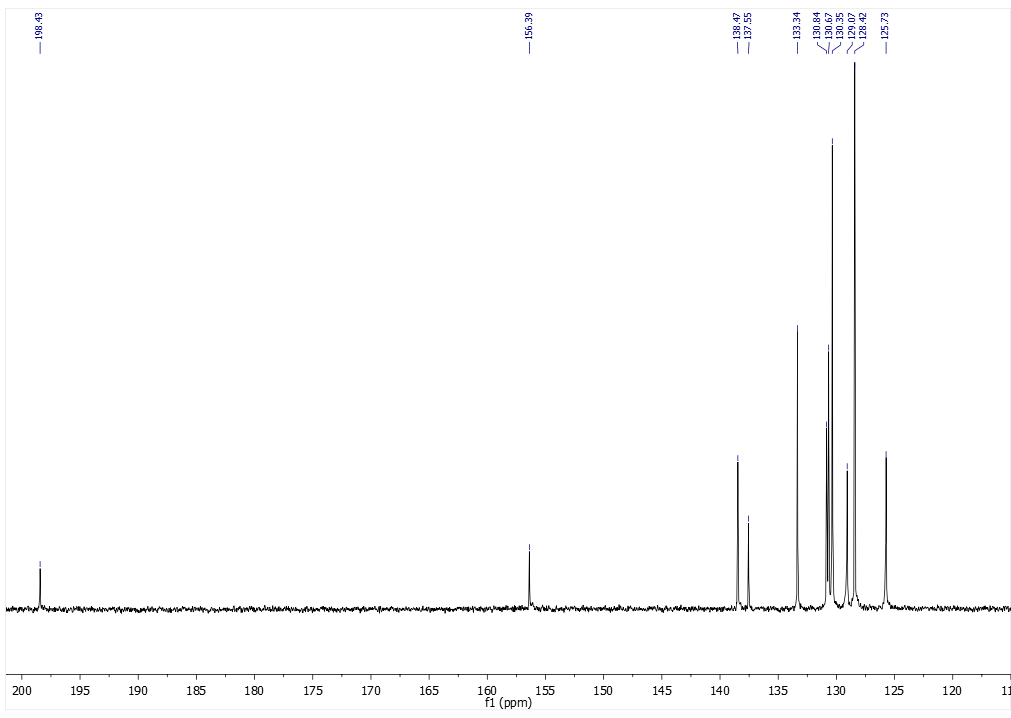


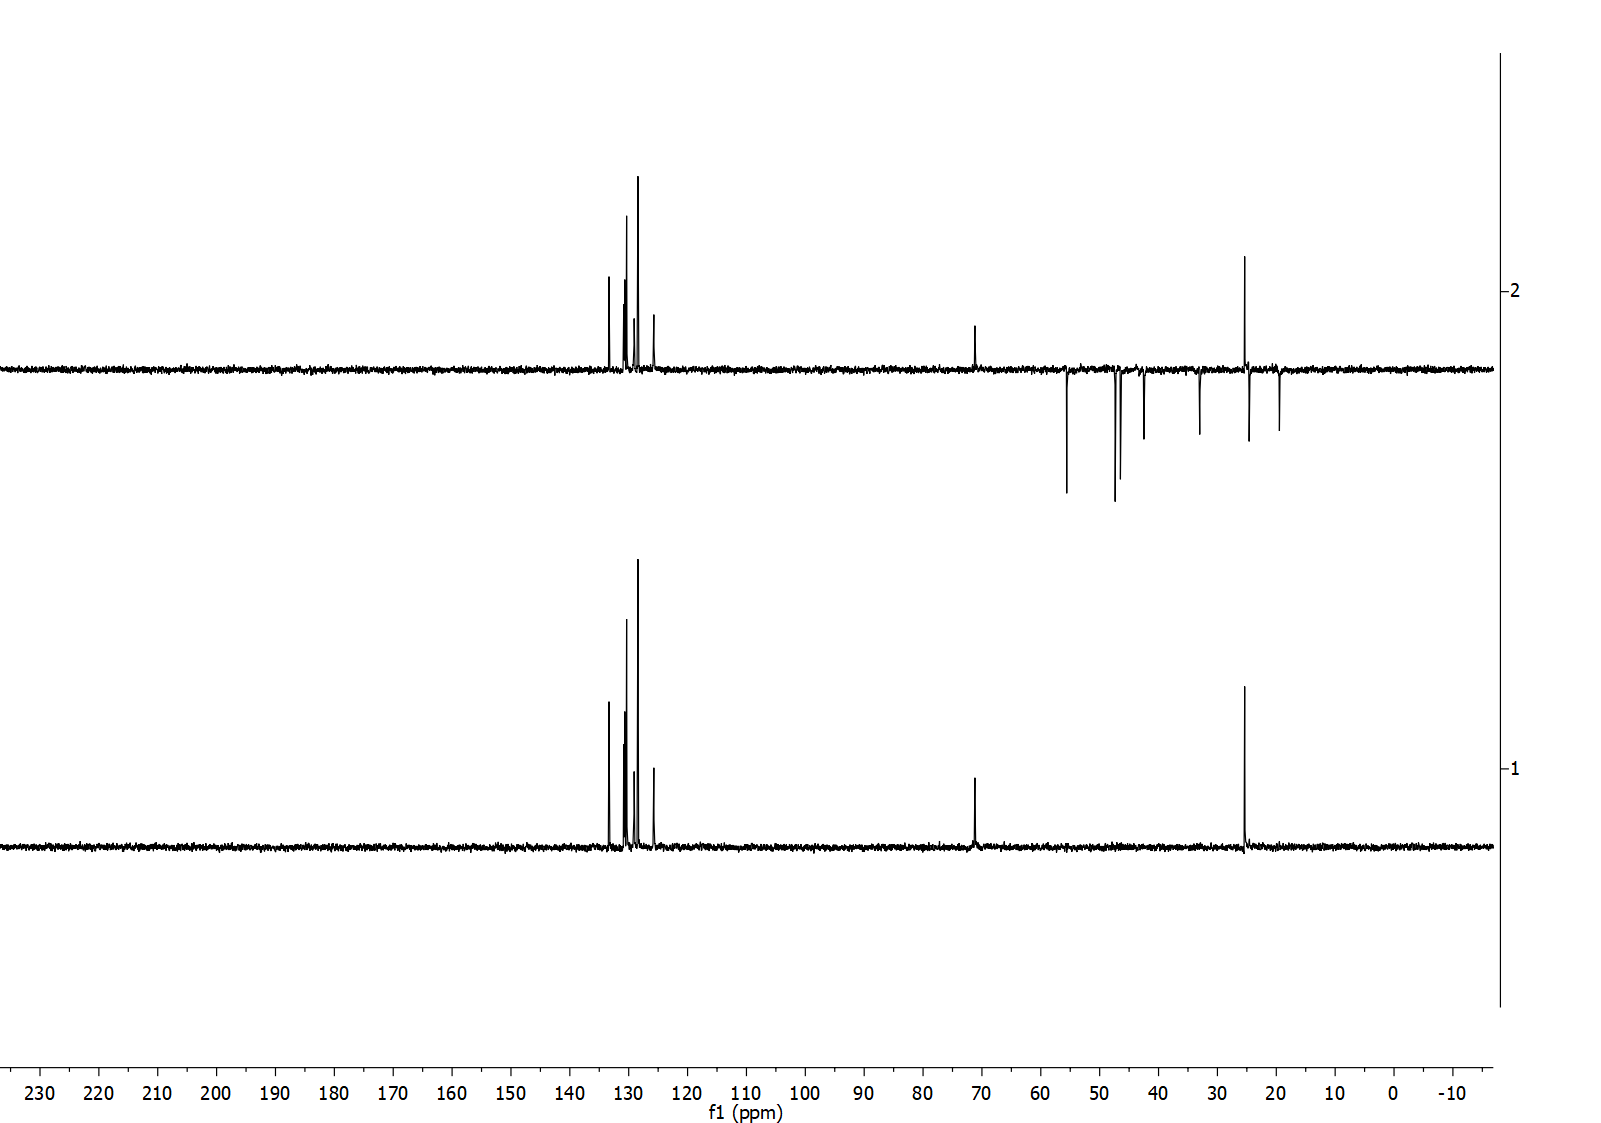
DEPT (400 MHz, CDCl3)


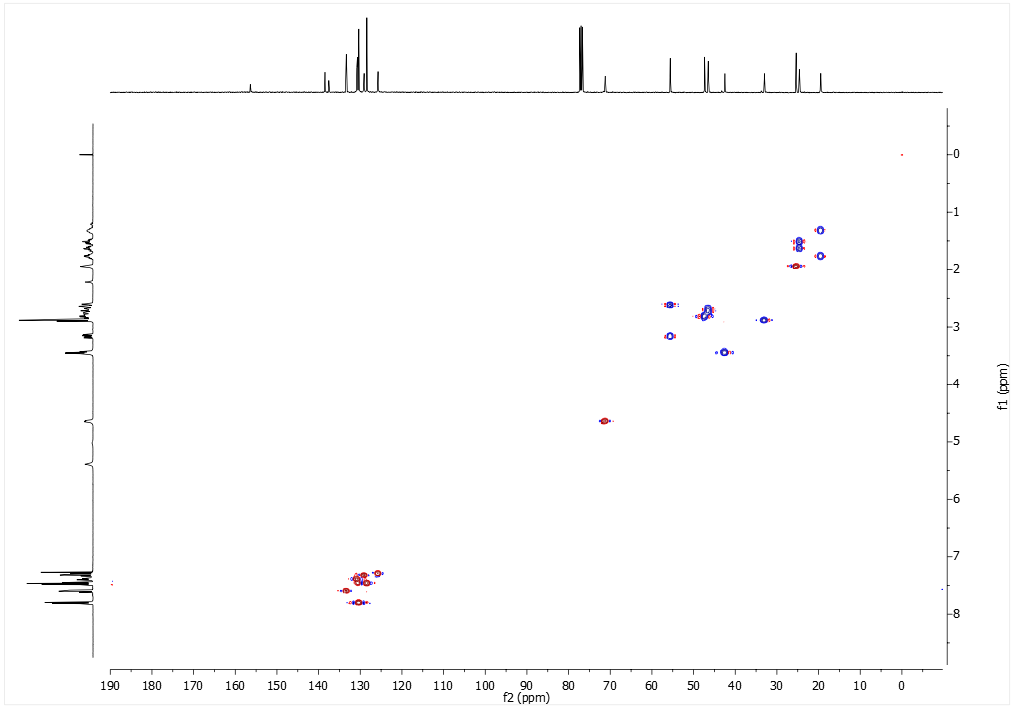
HSQC (400 MHz, CDCl3)


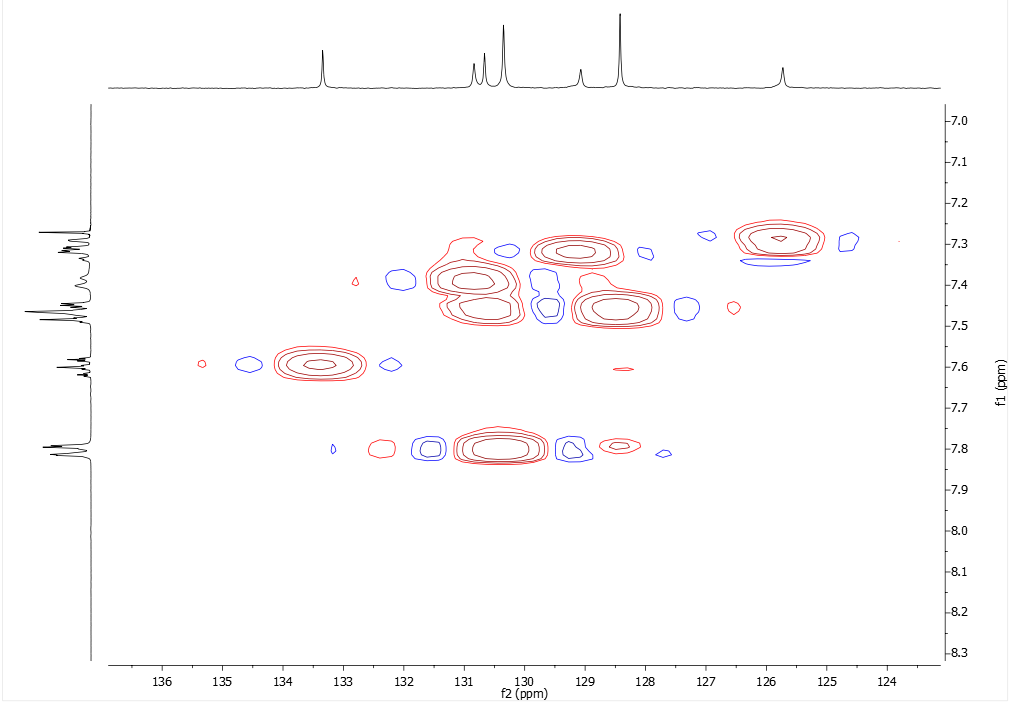


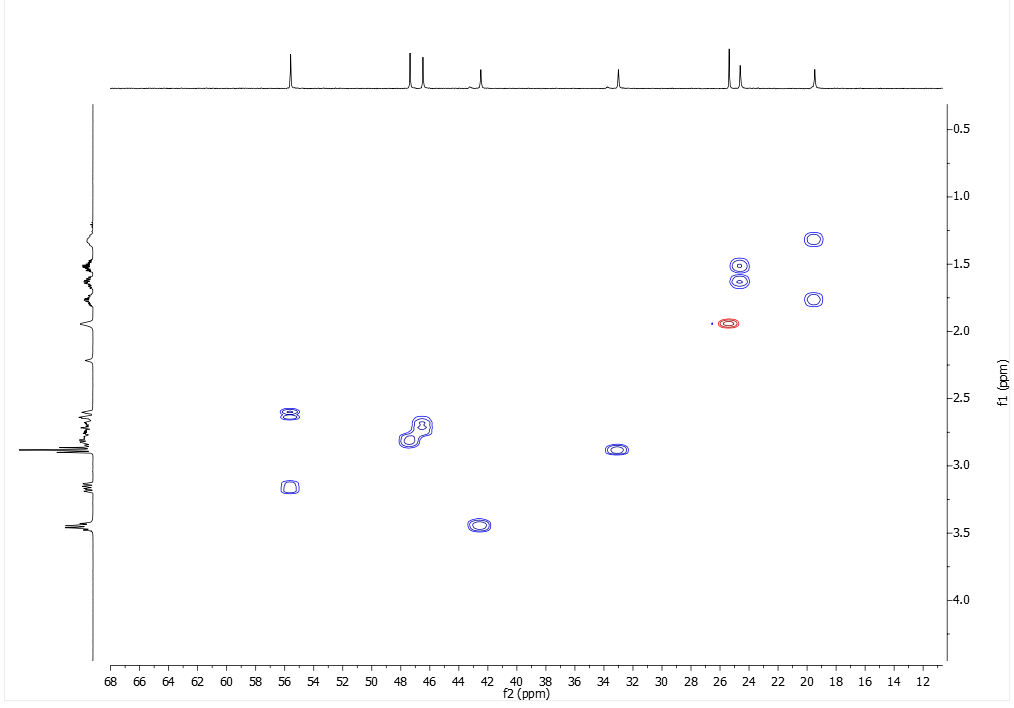


COSY (400 MHz, CDCl3)


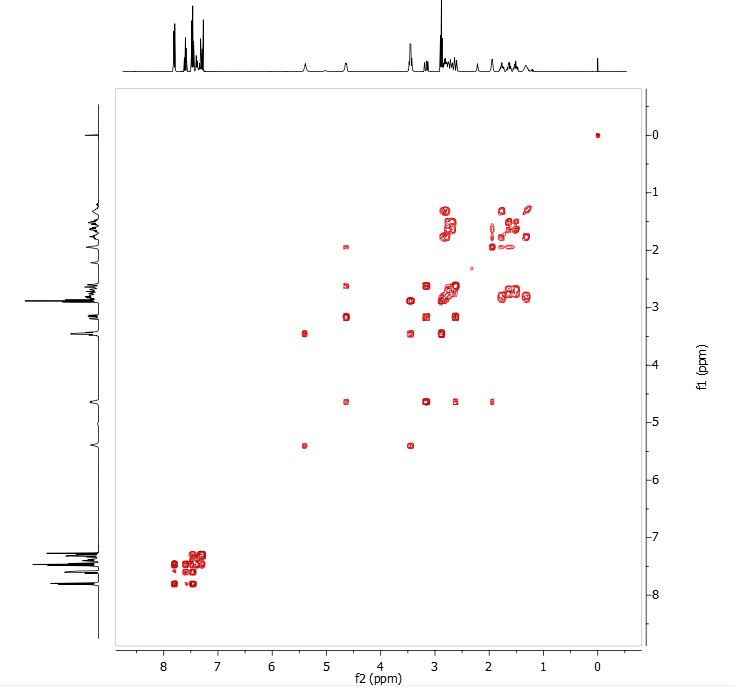


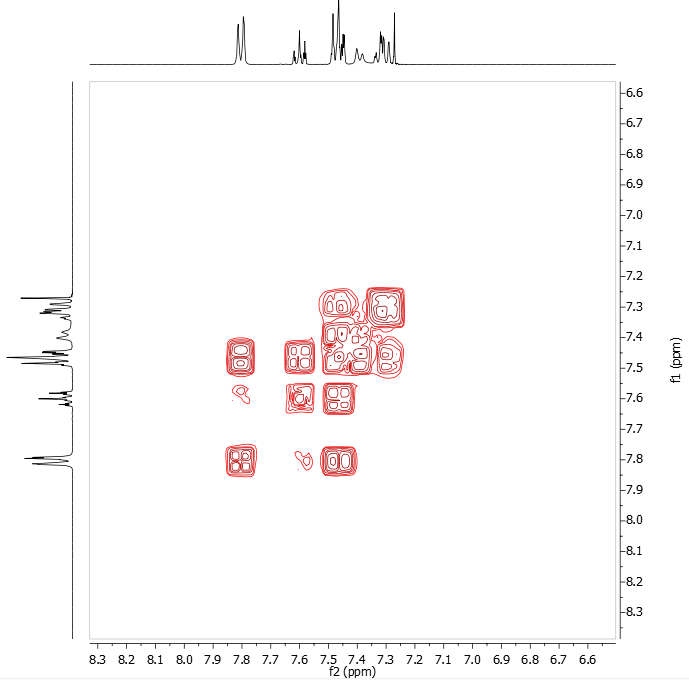

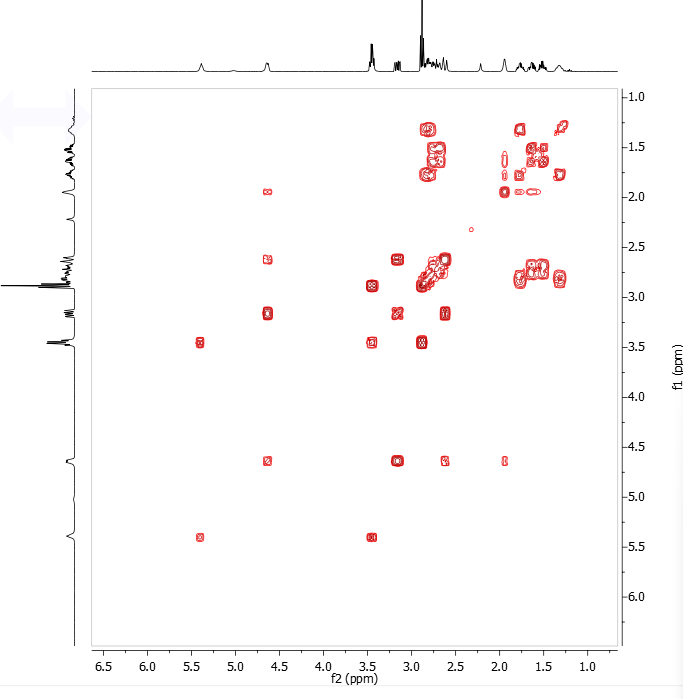


IR (KBr) spectrum of Impurity K


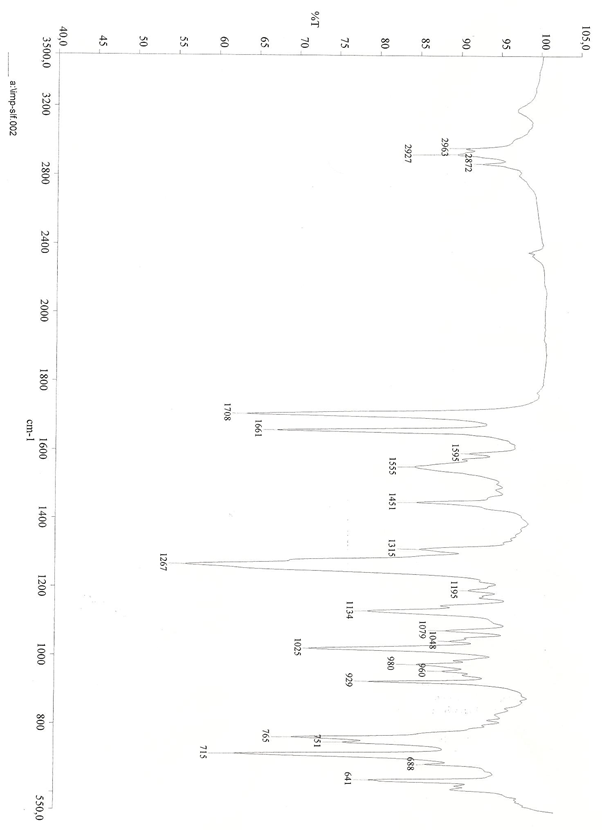


GC/MS (EI) of Impurity K

**
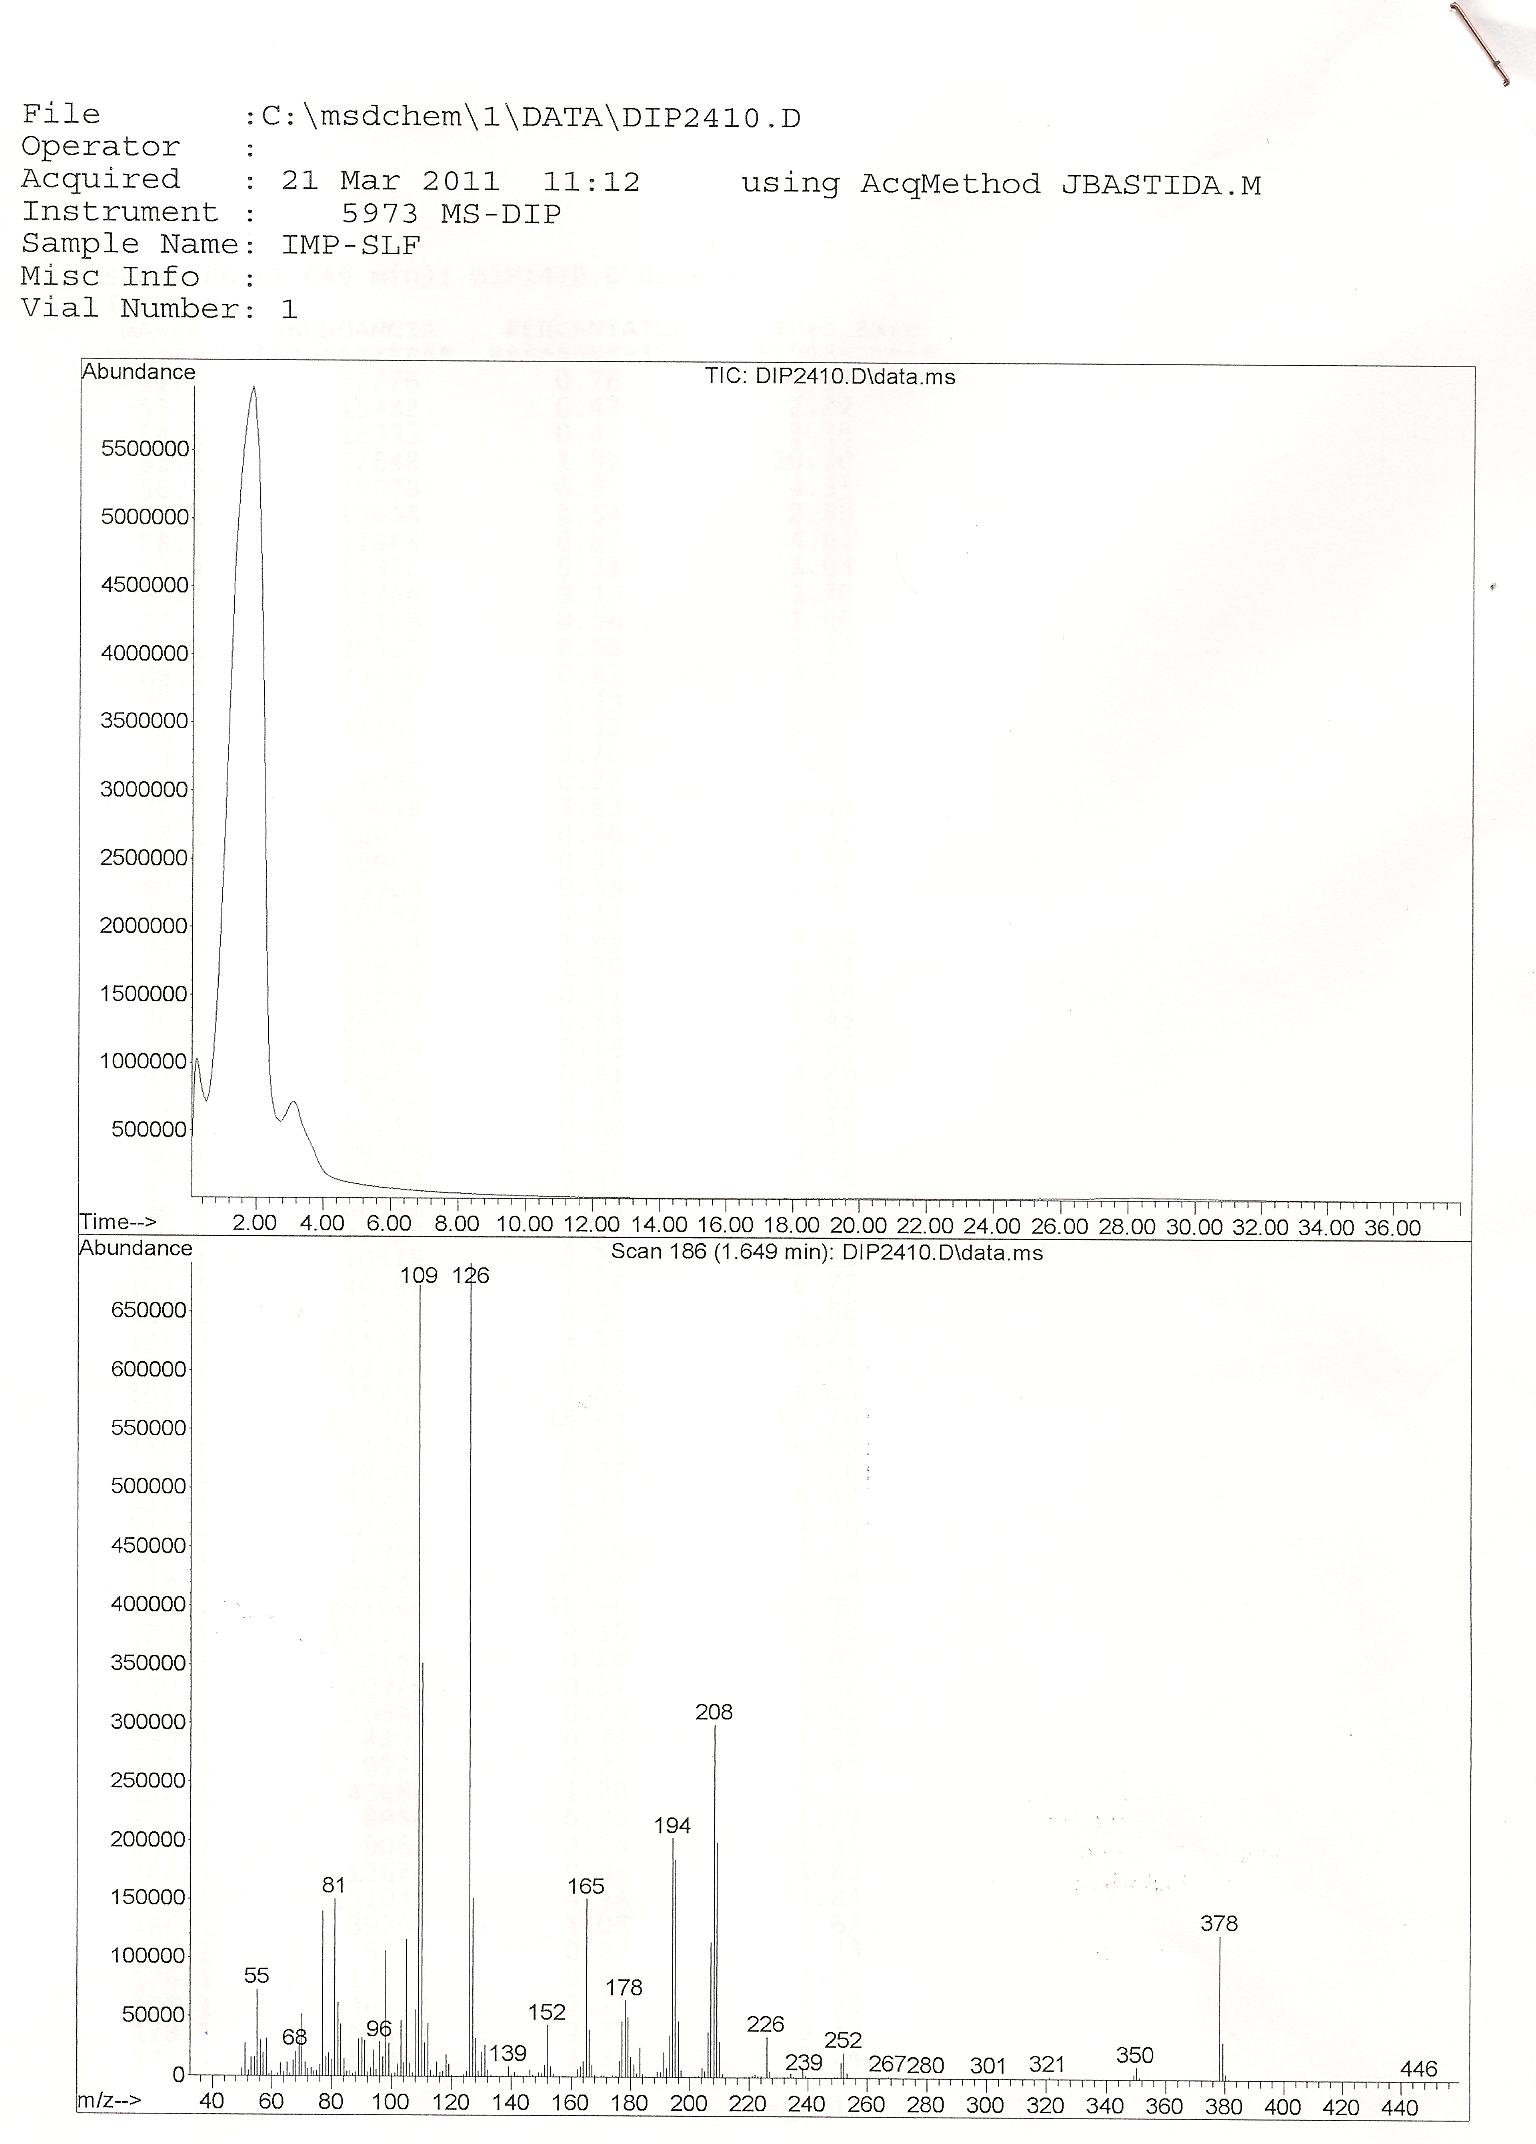
**


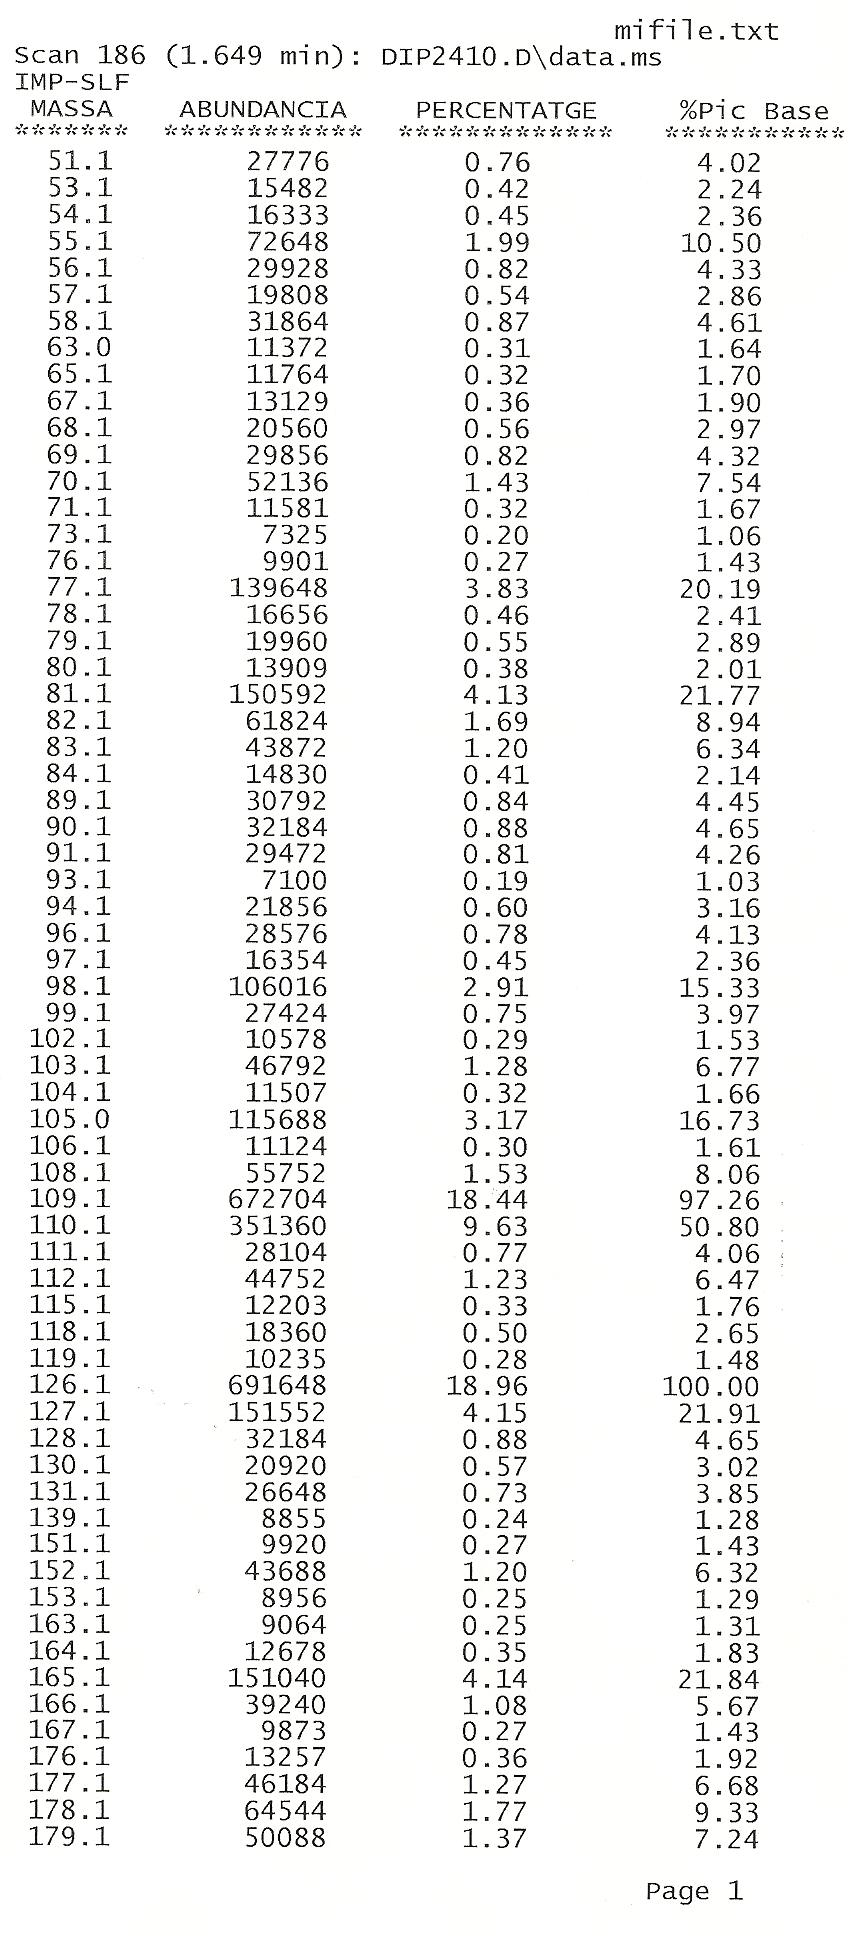

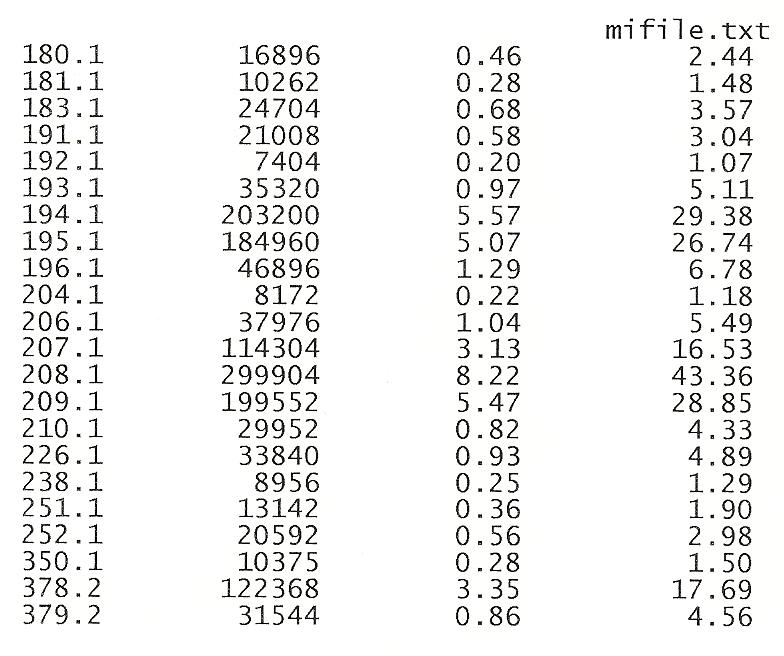


UV of Impurity K:


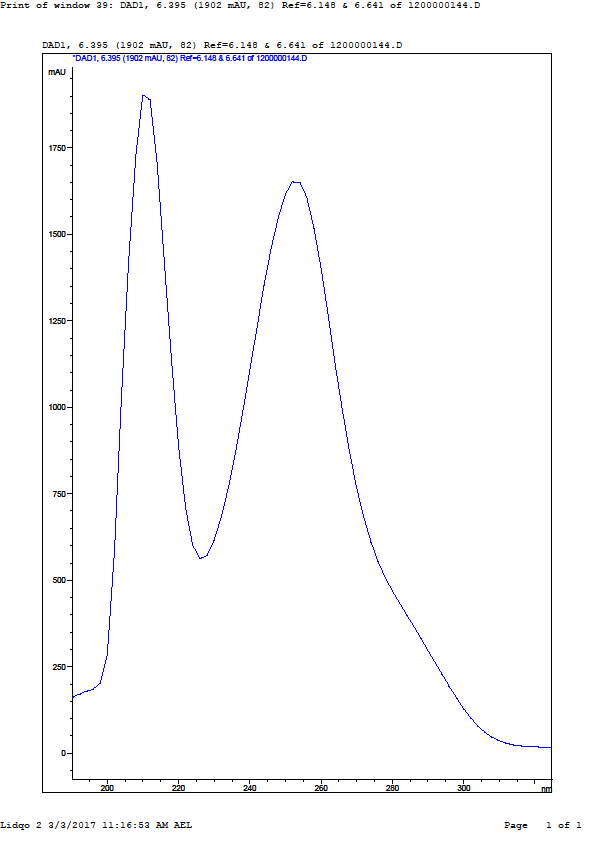


**HPLC/MS-MS of Solifenacin succinate tablets**


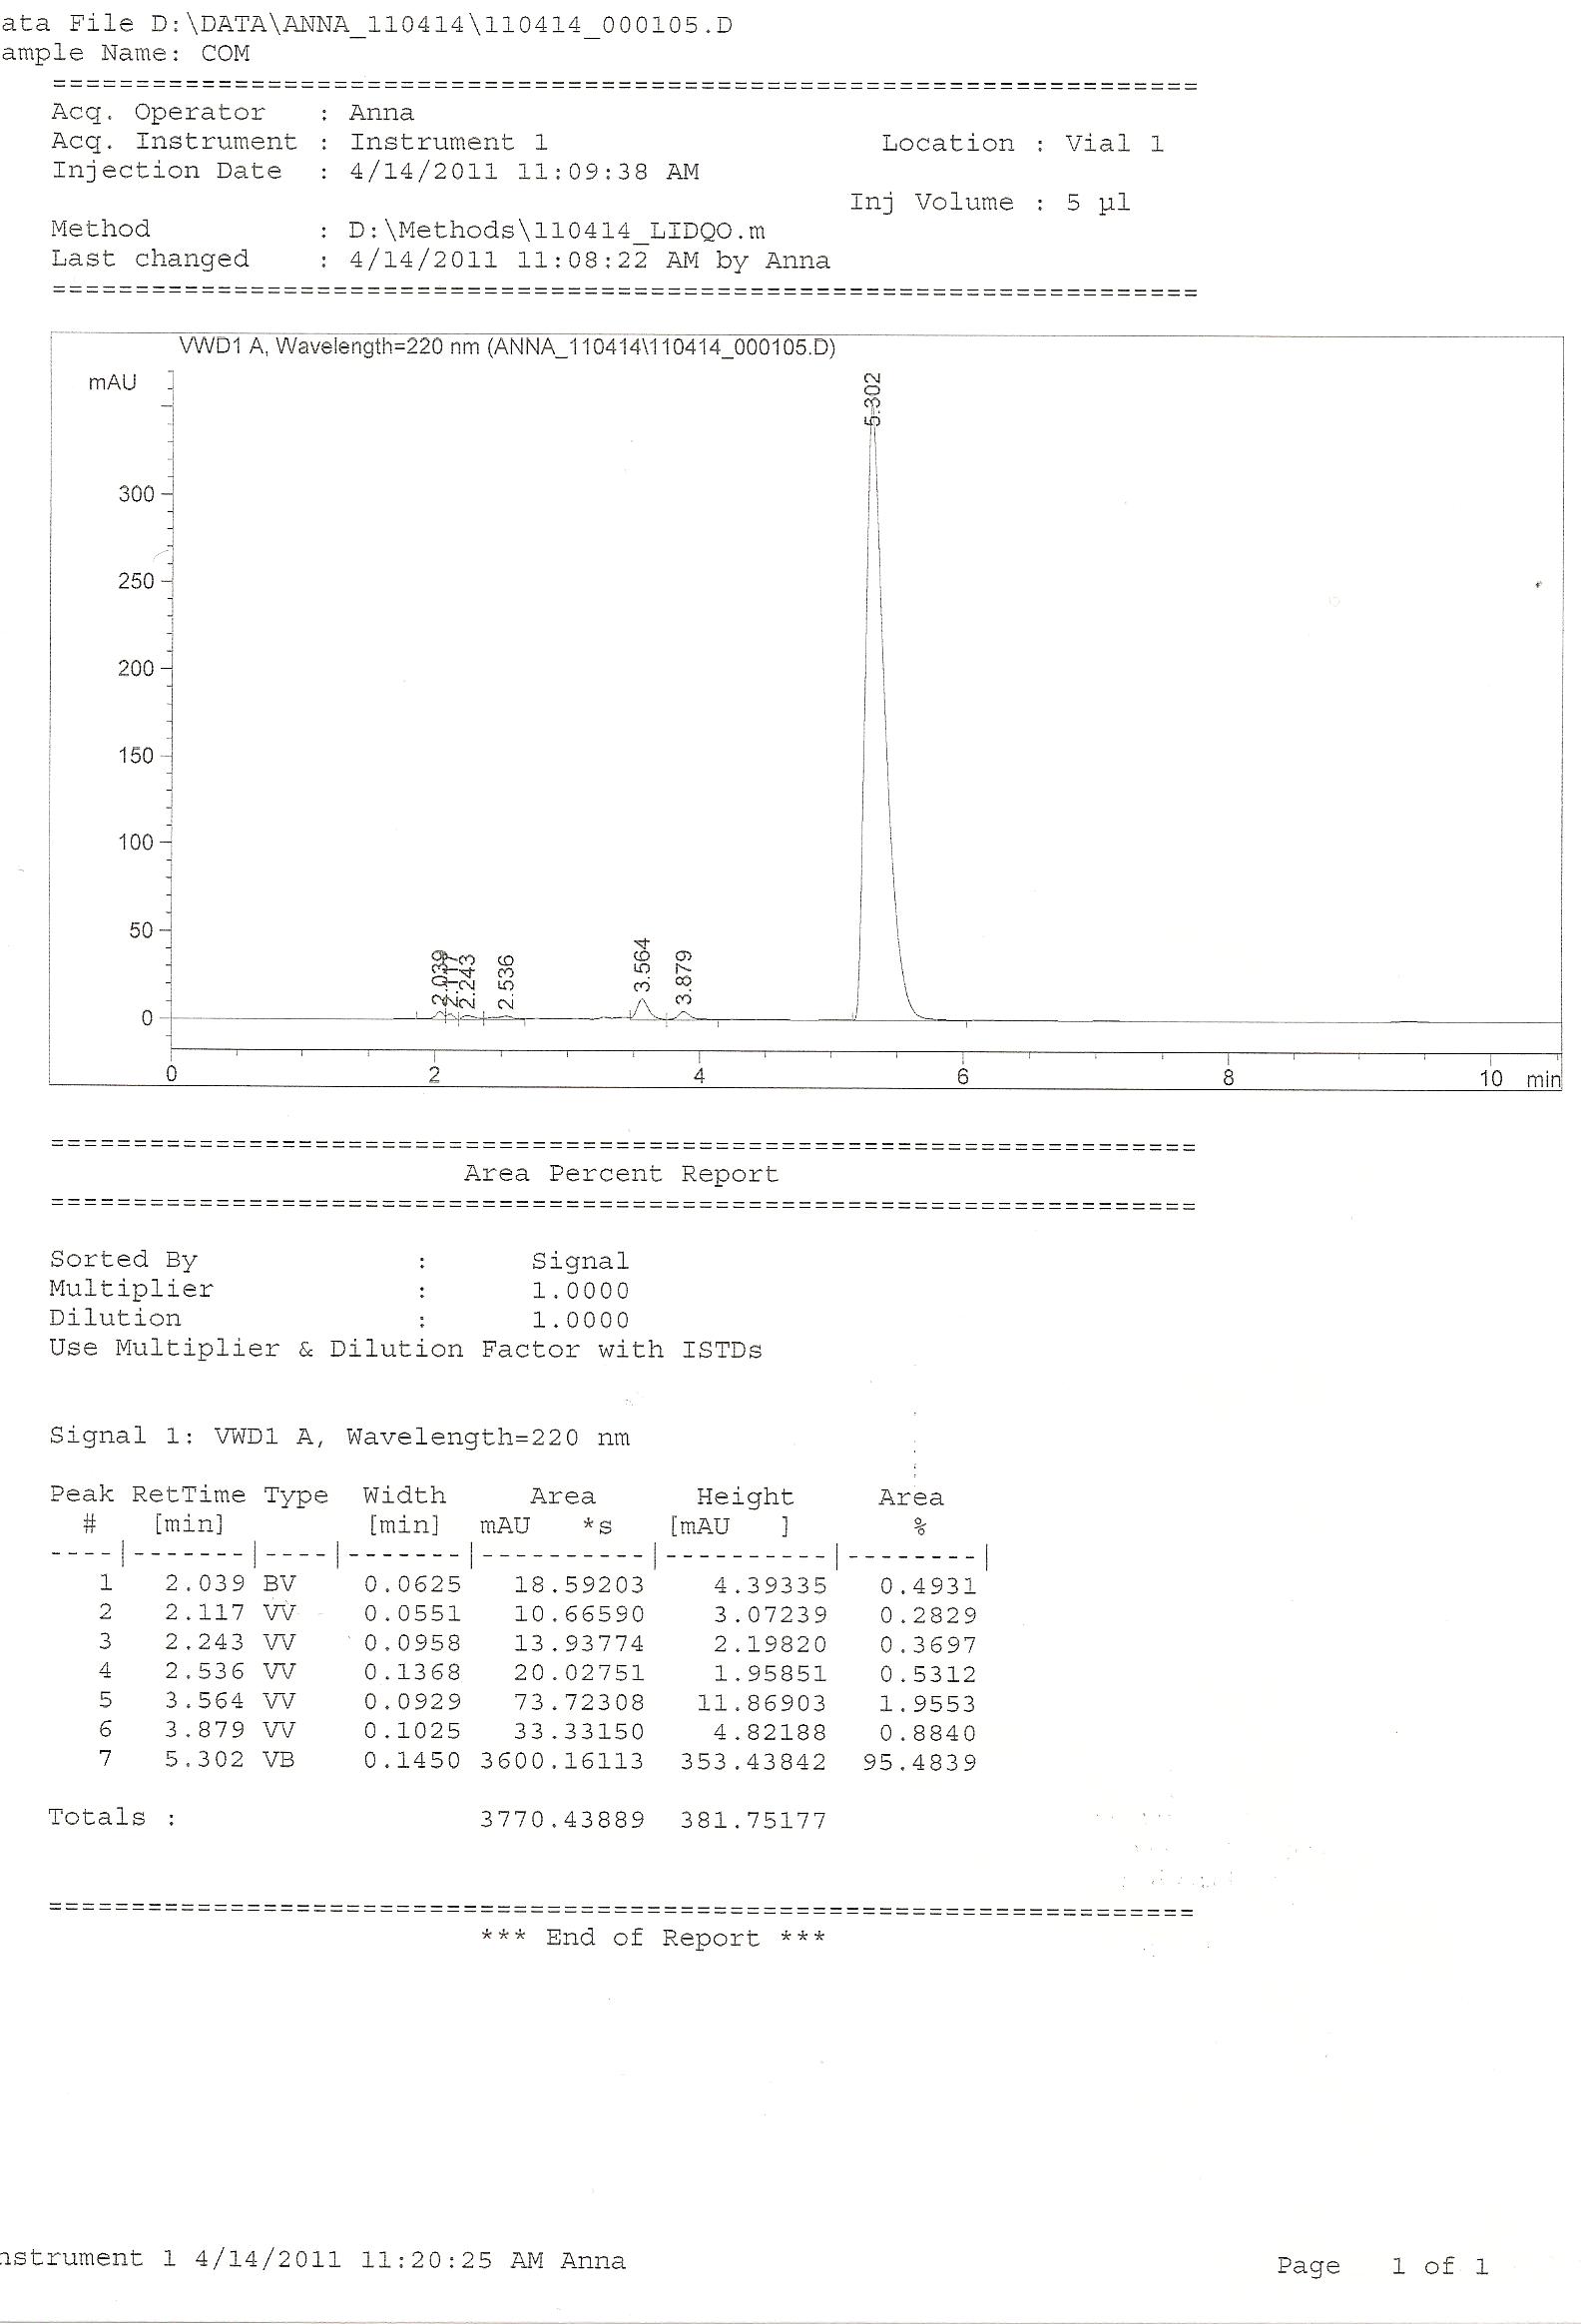


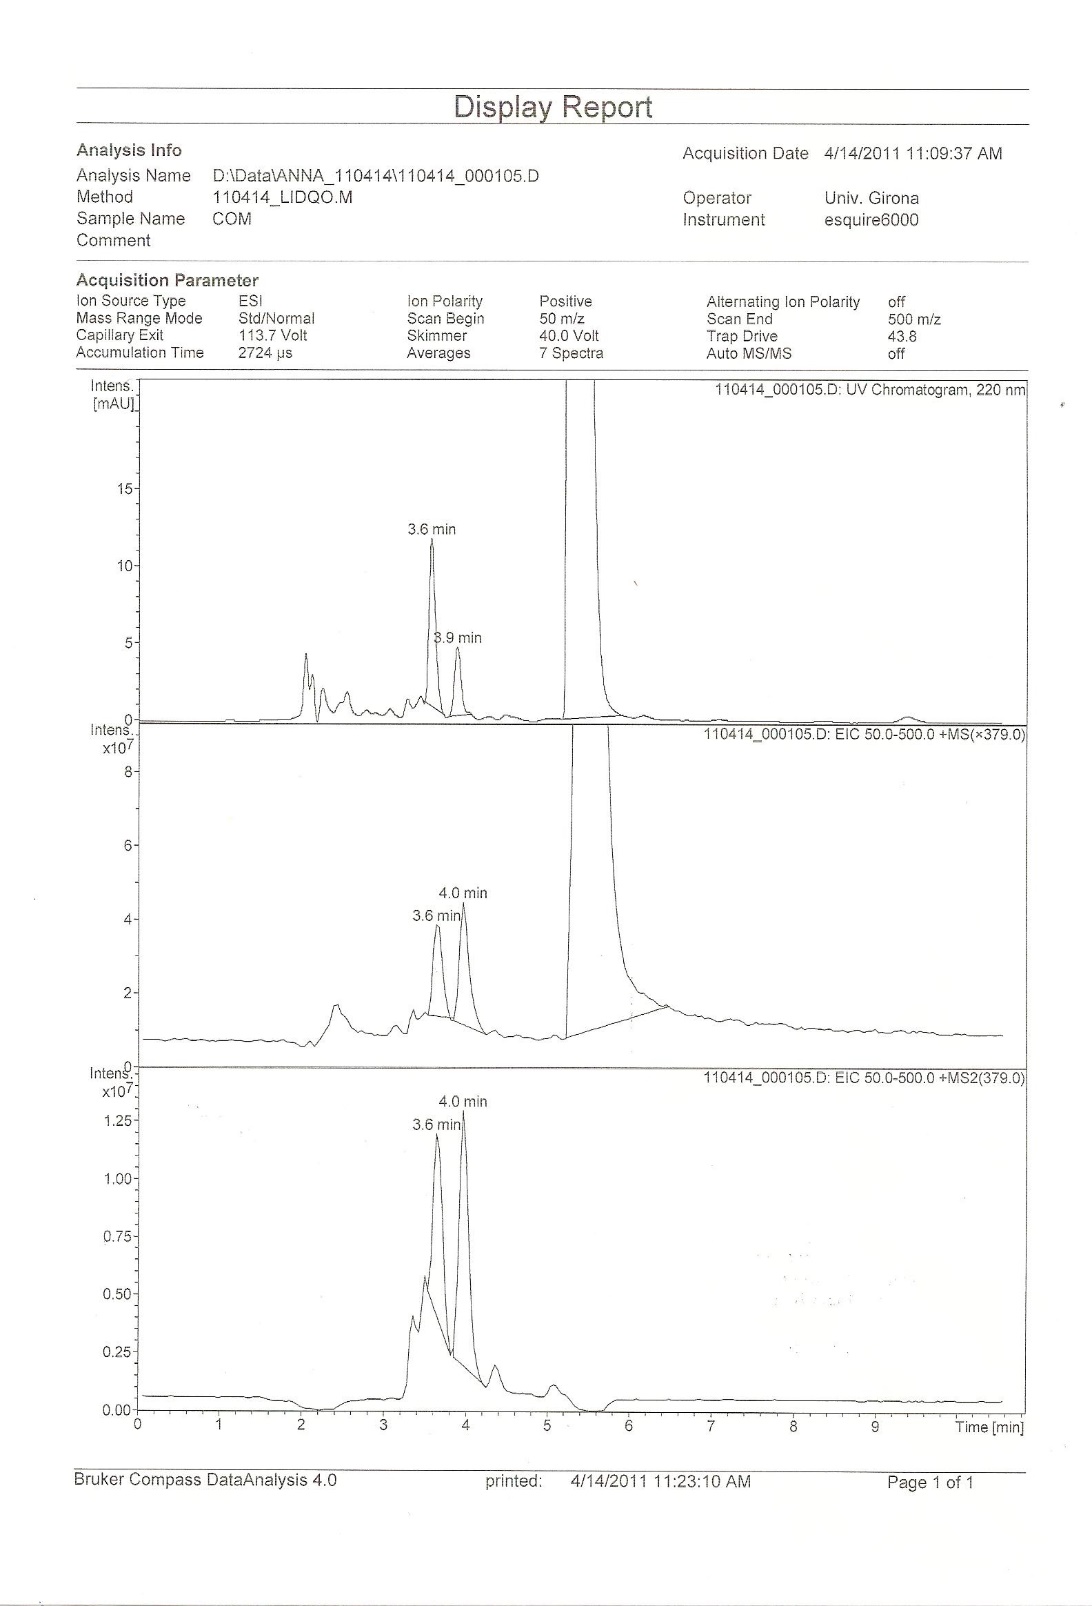

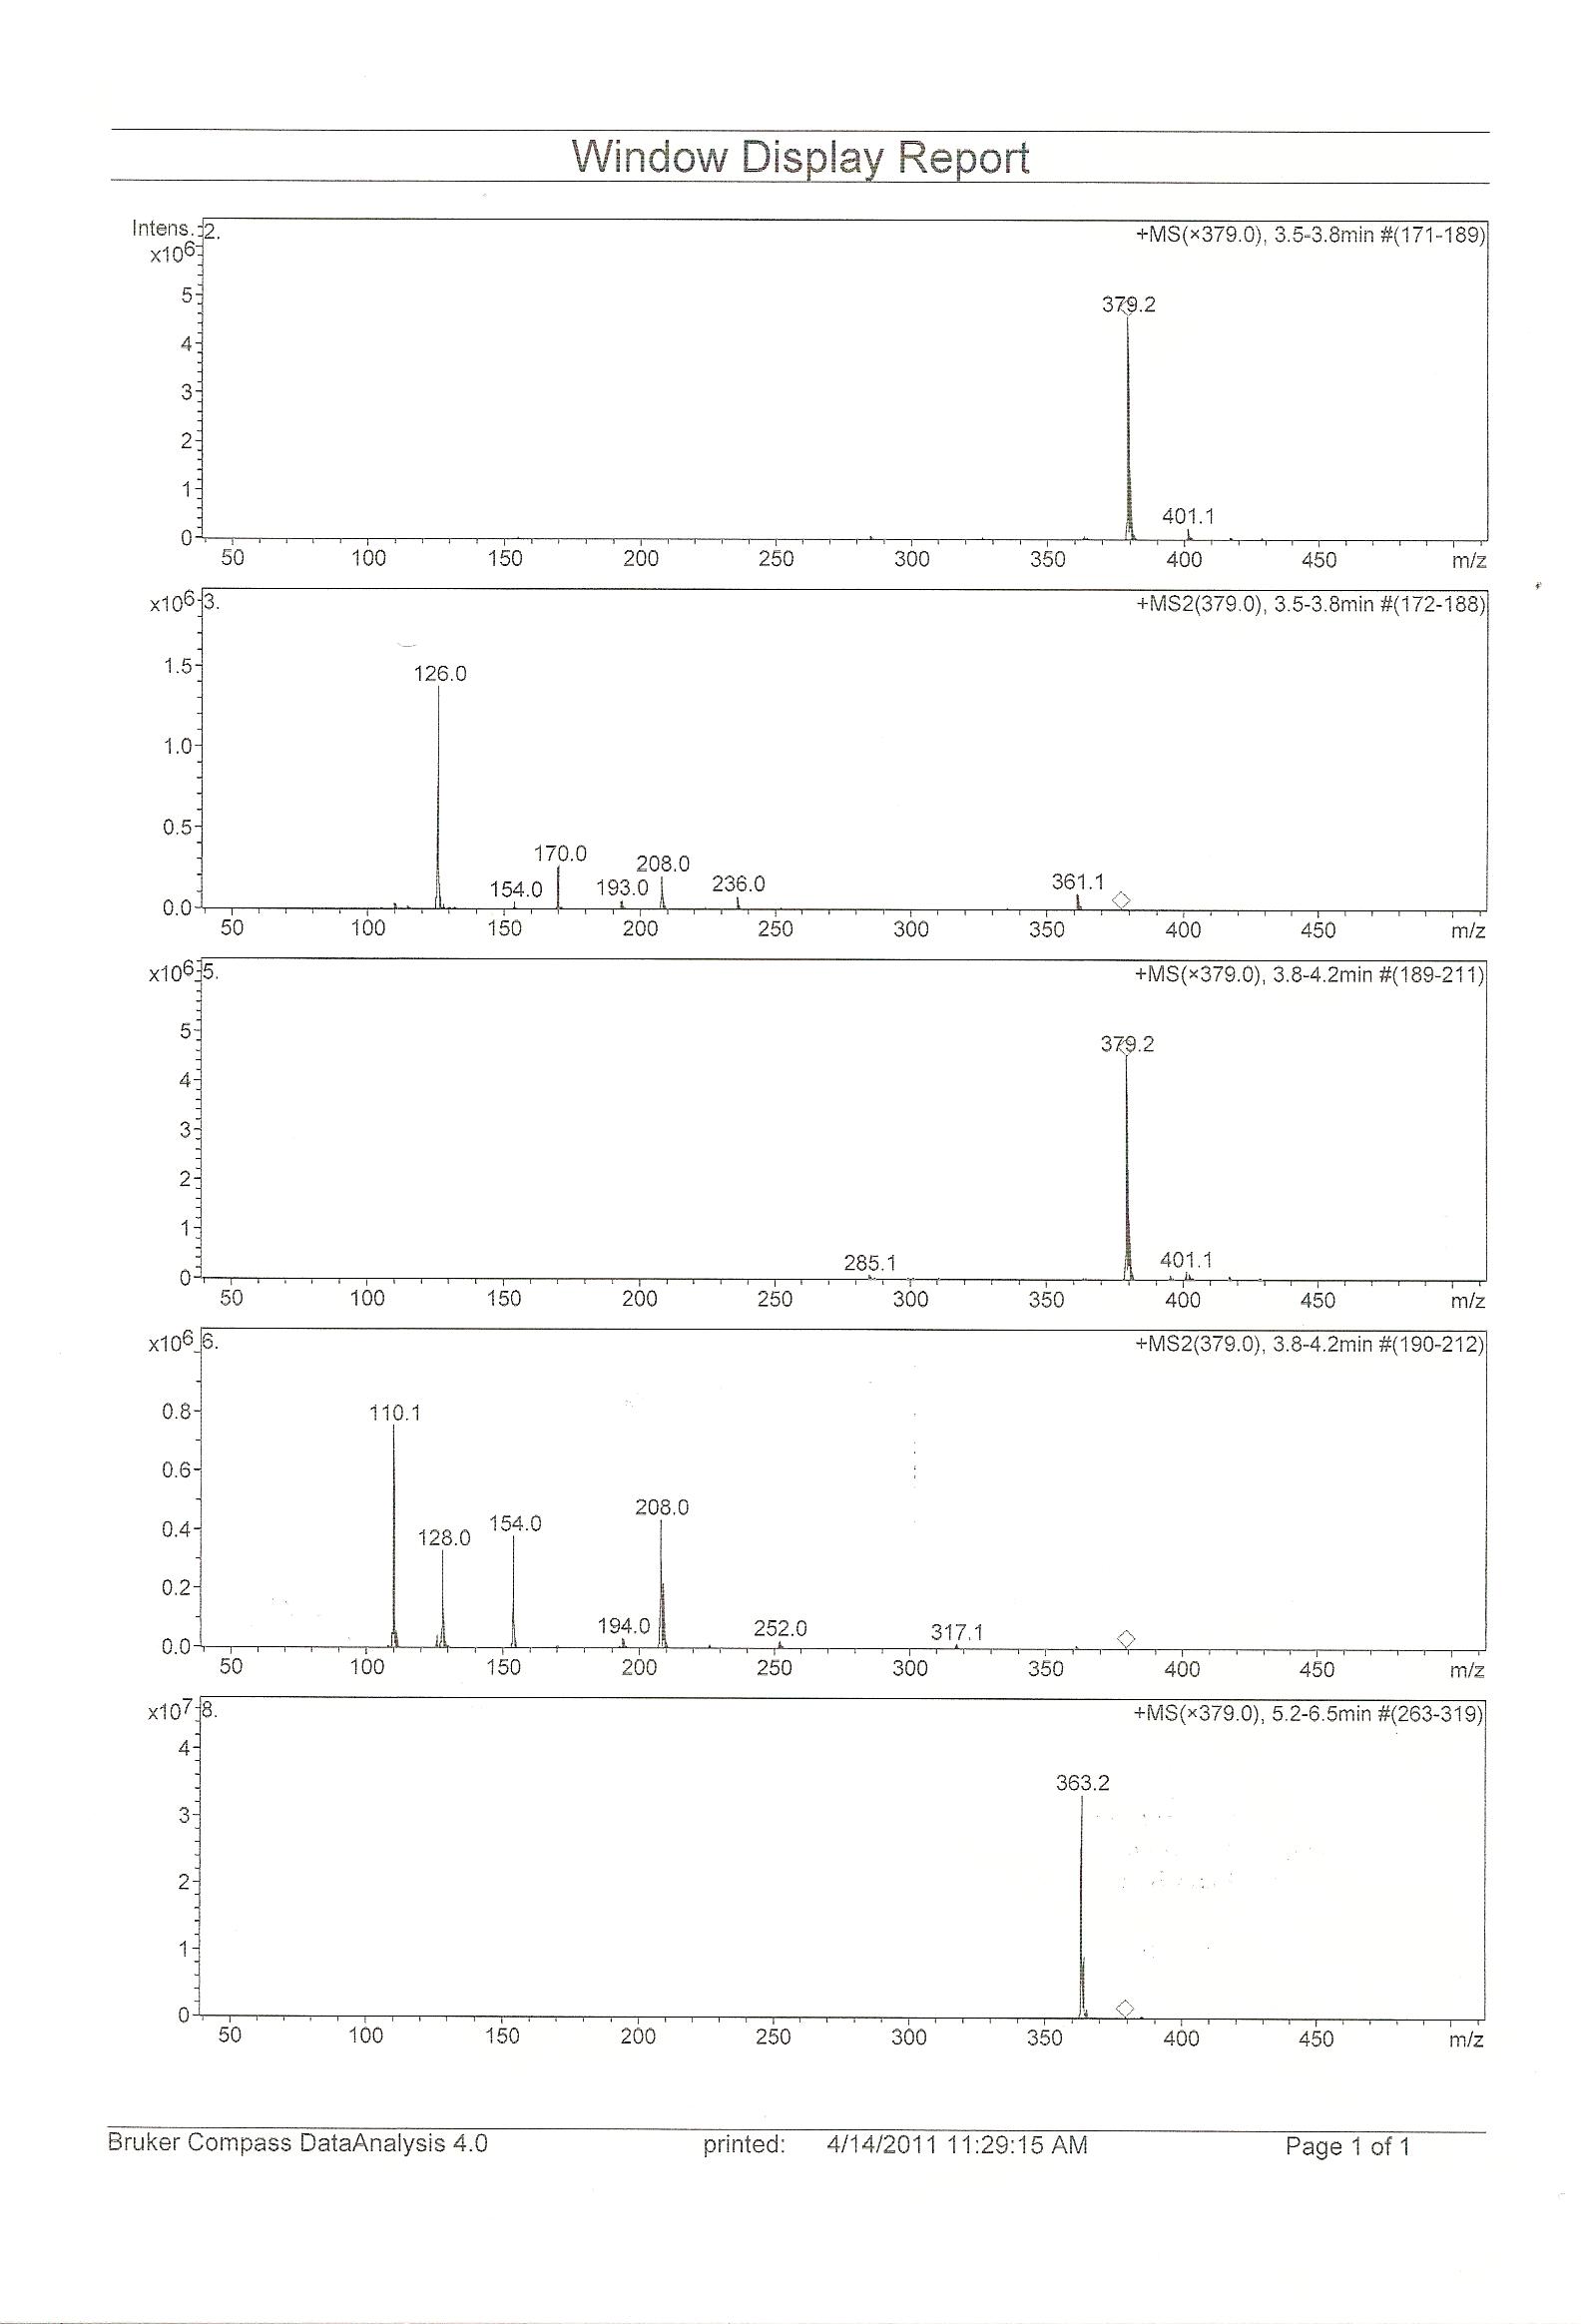


**HPLC/MS-MS of Impurity I**


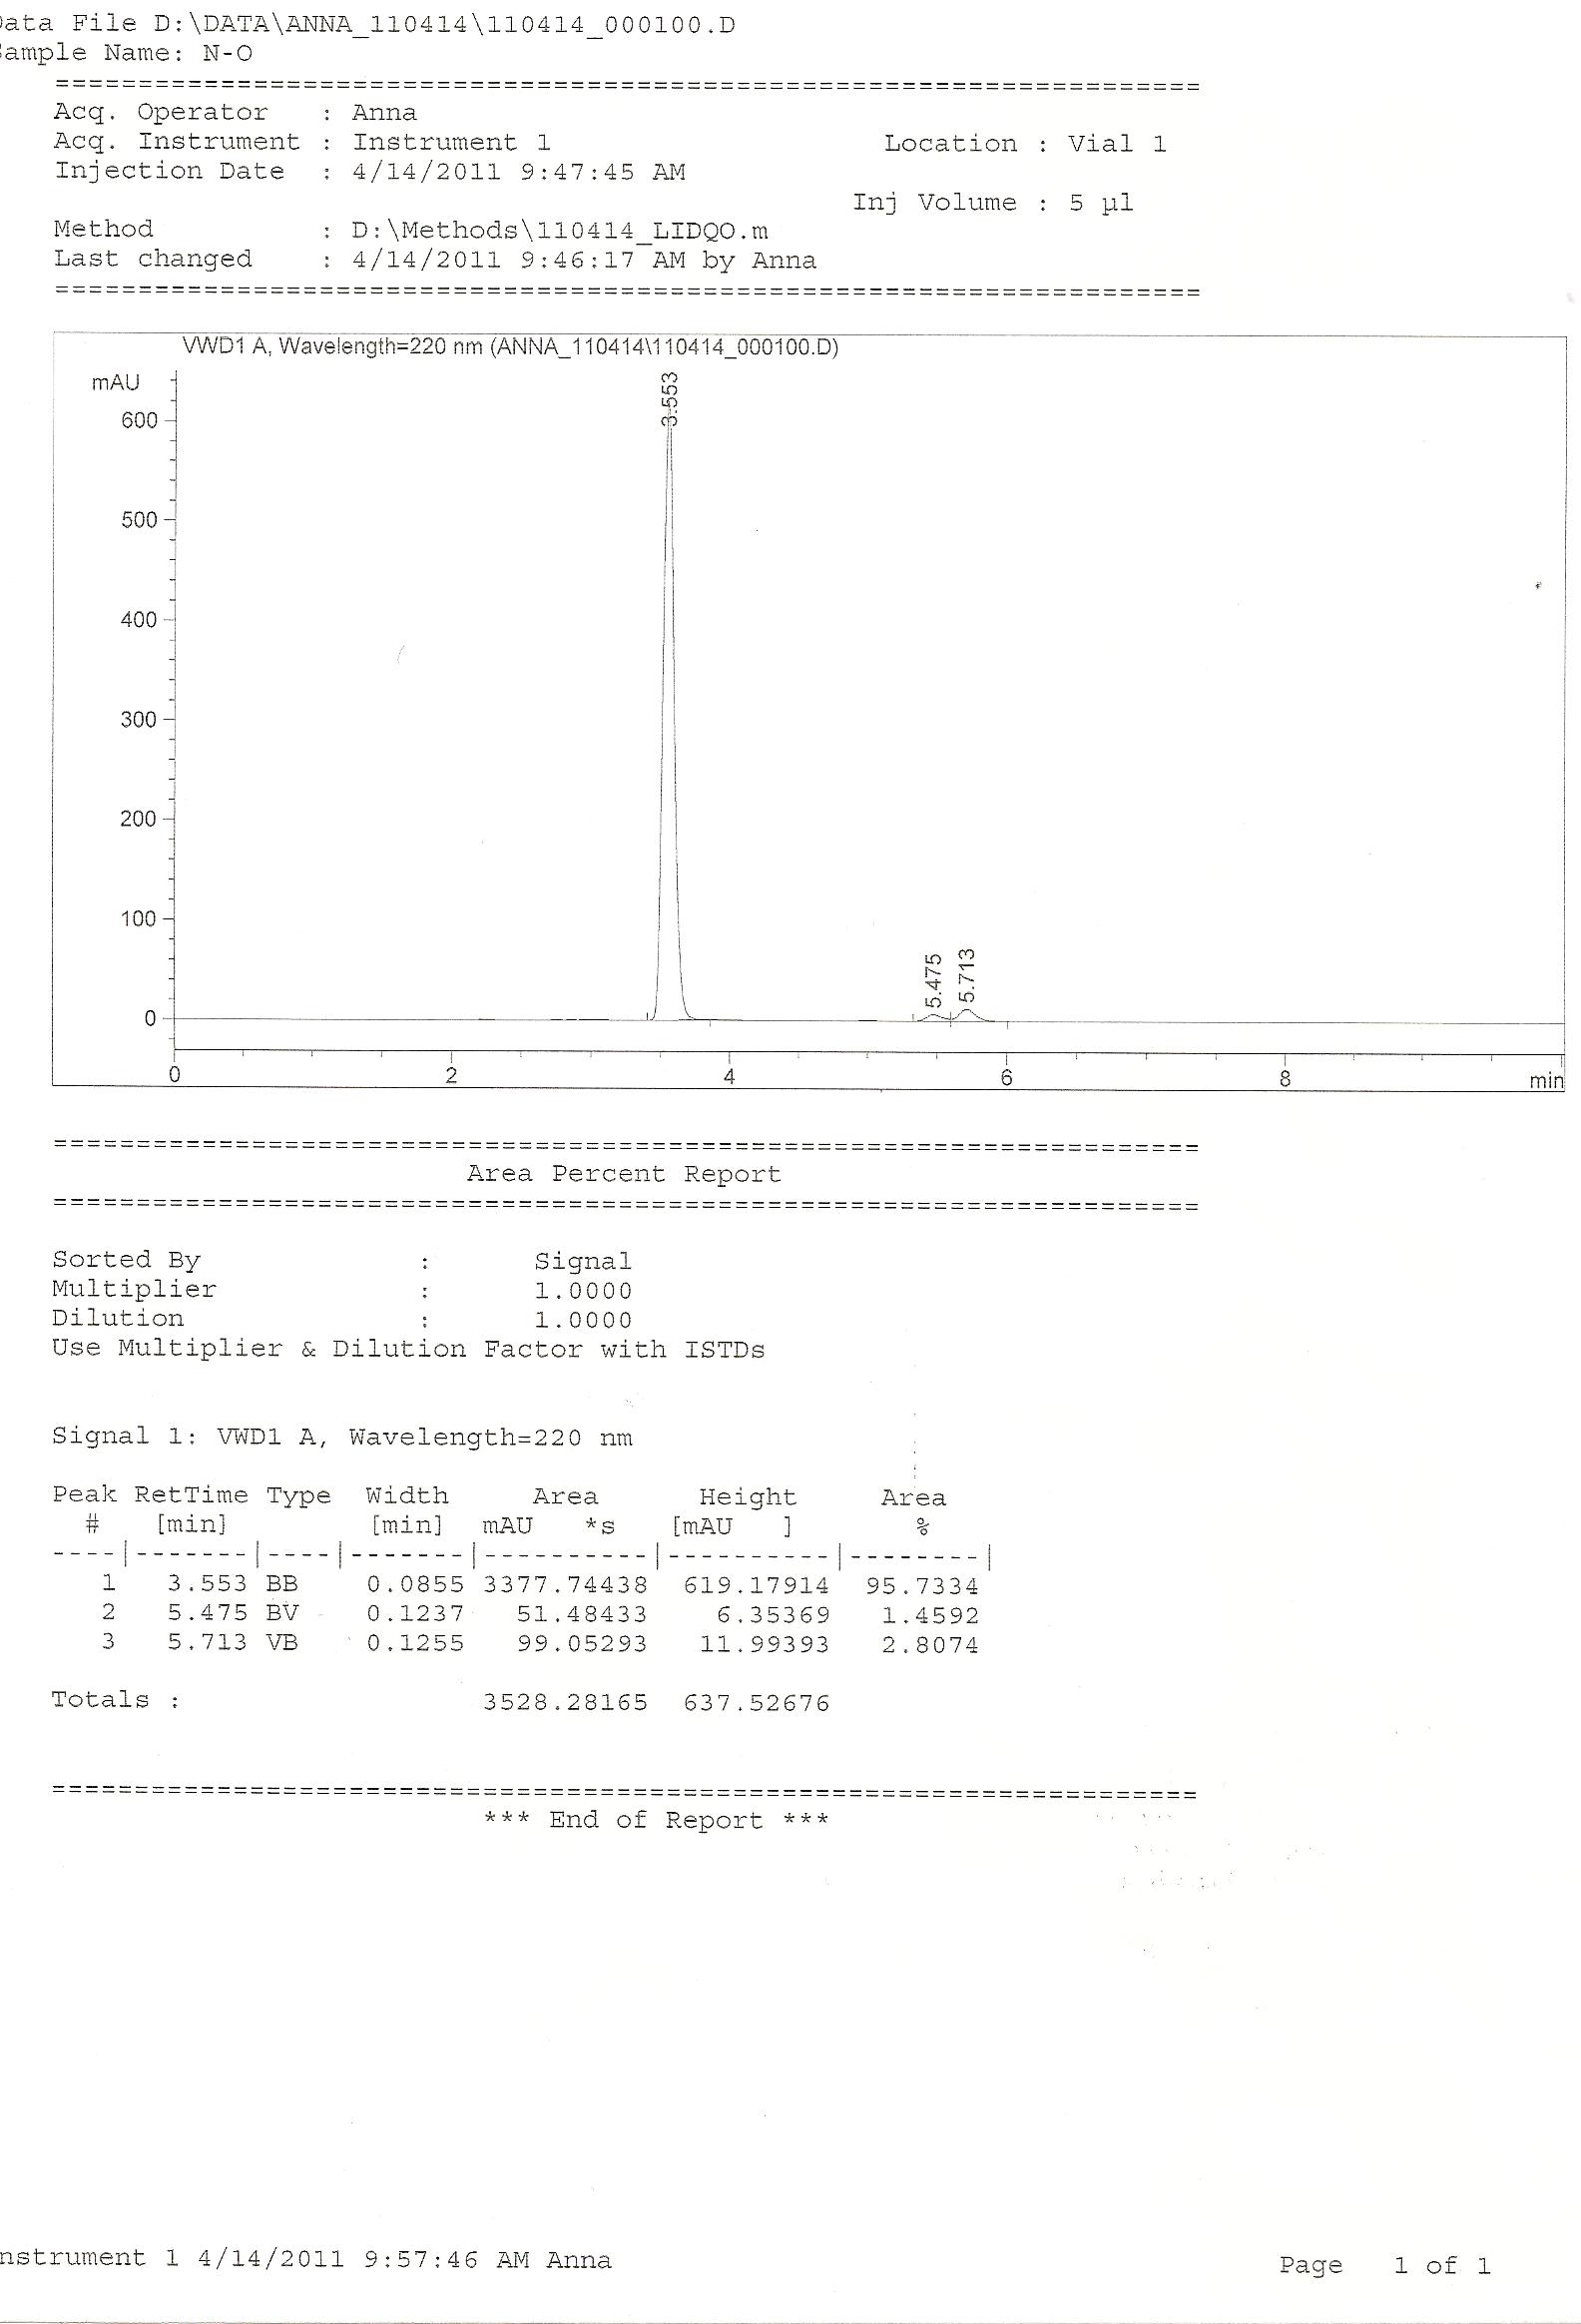


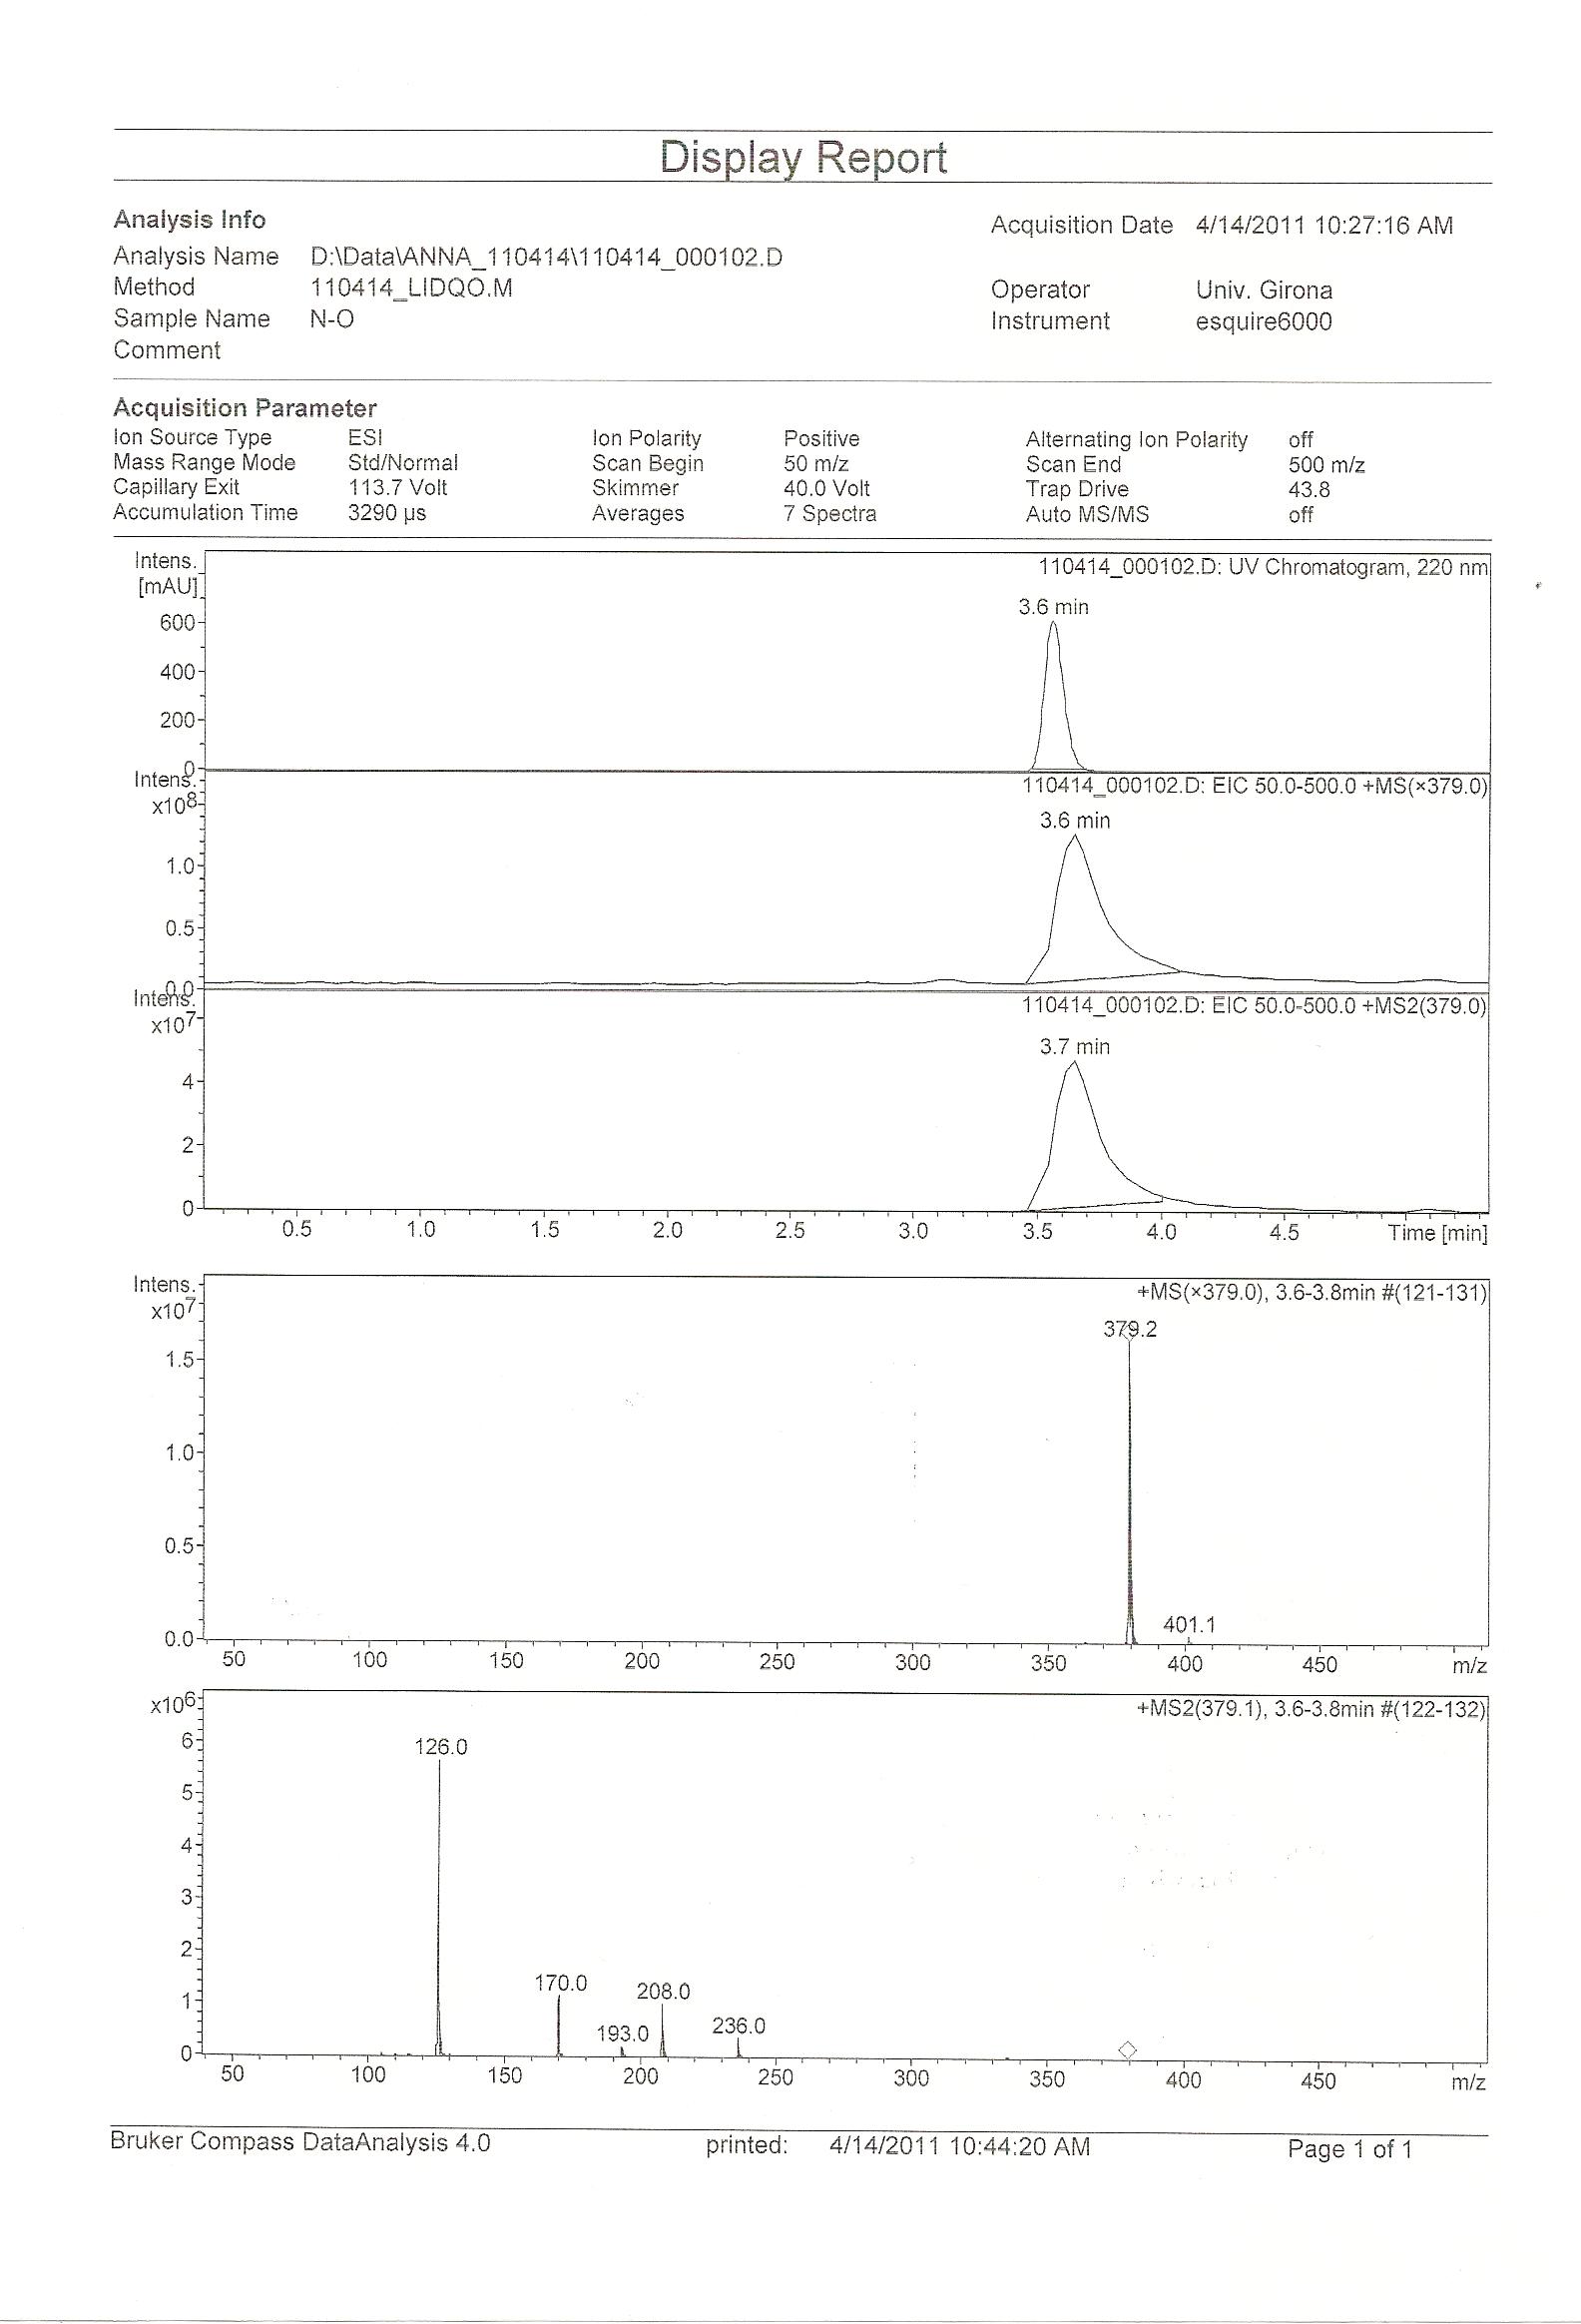


**HPLC/MS-MS of Impurity K**


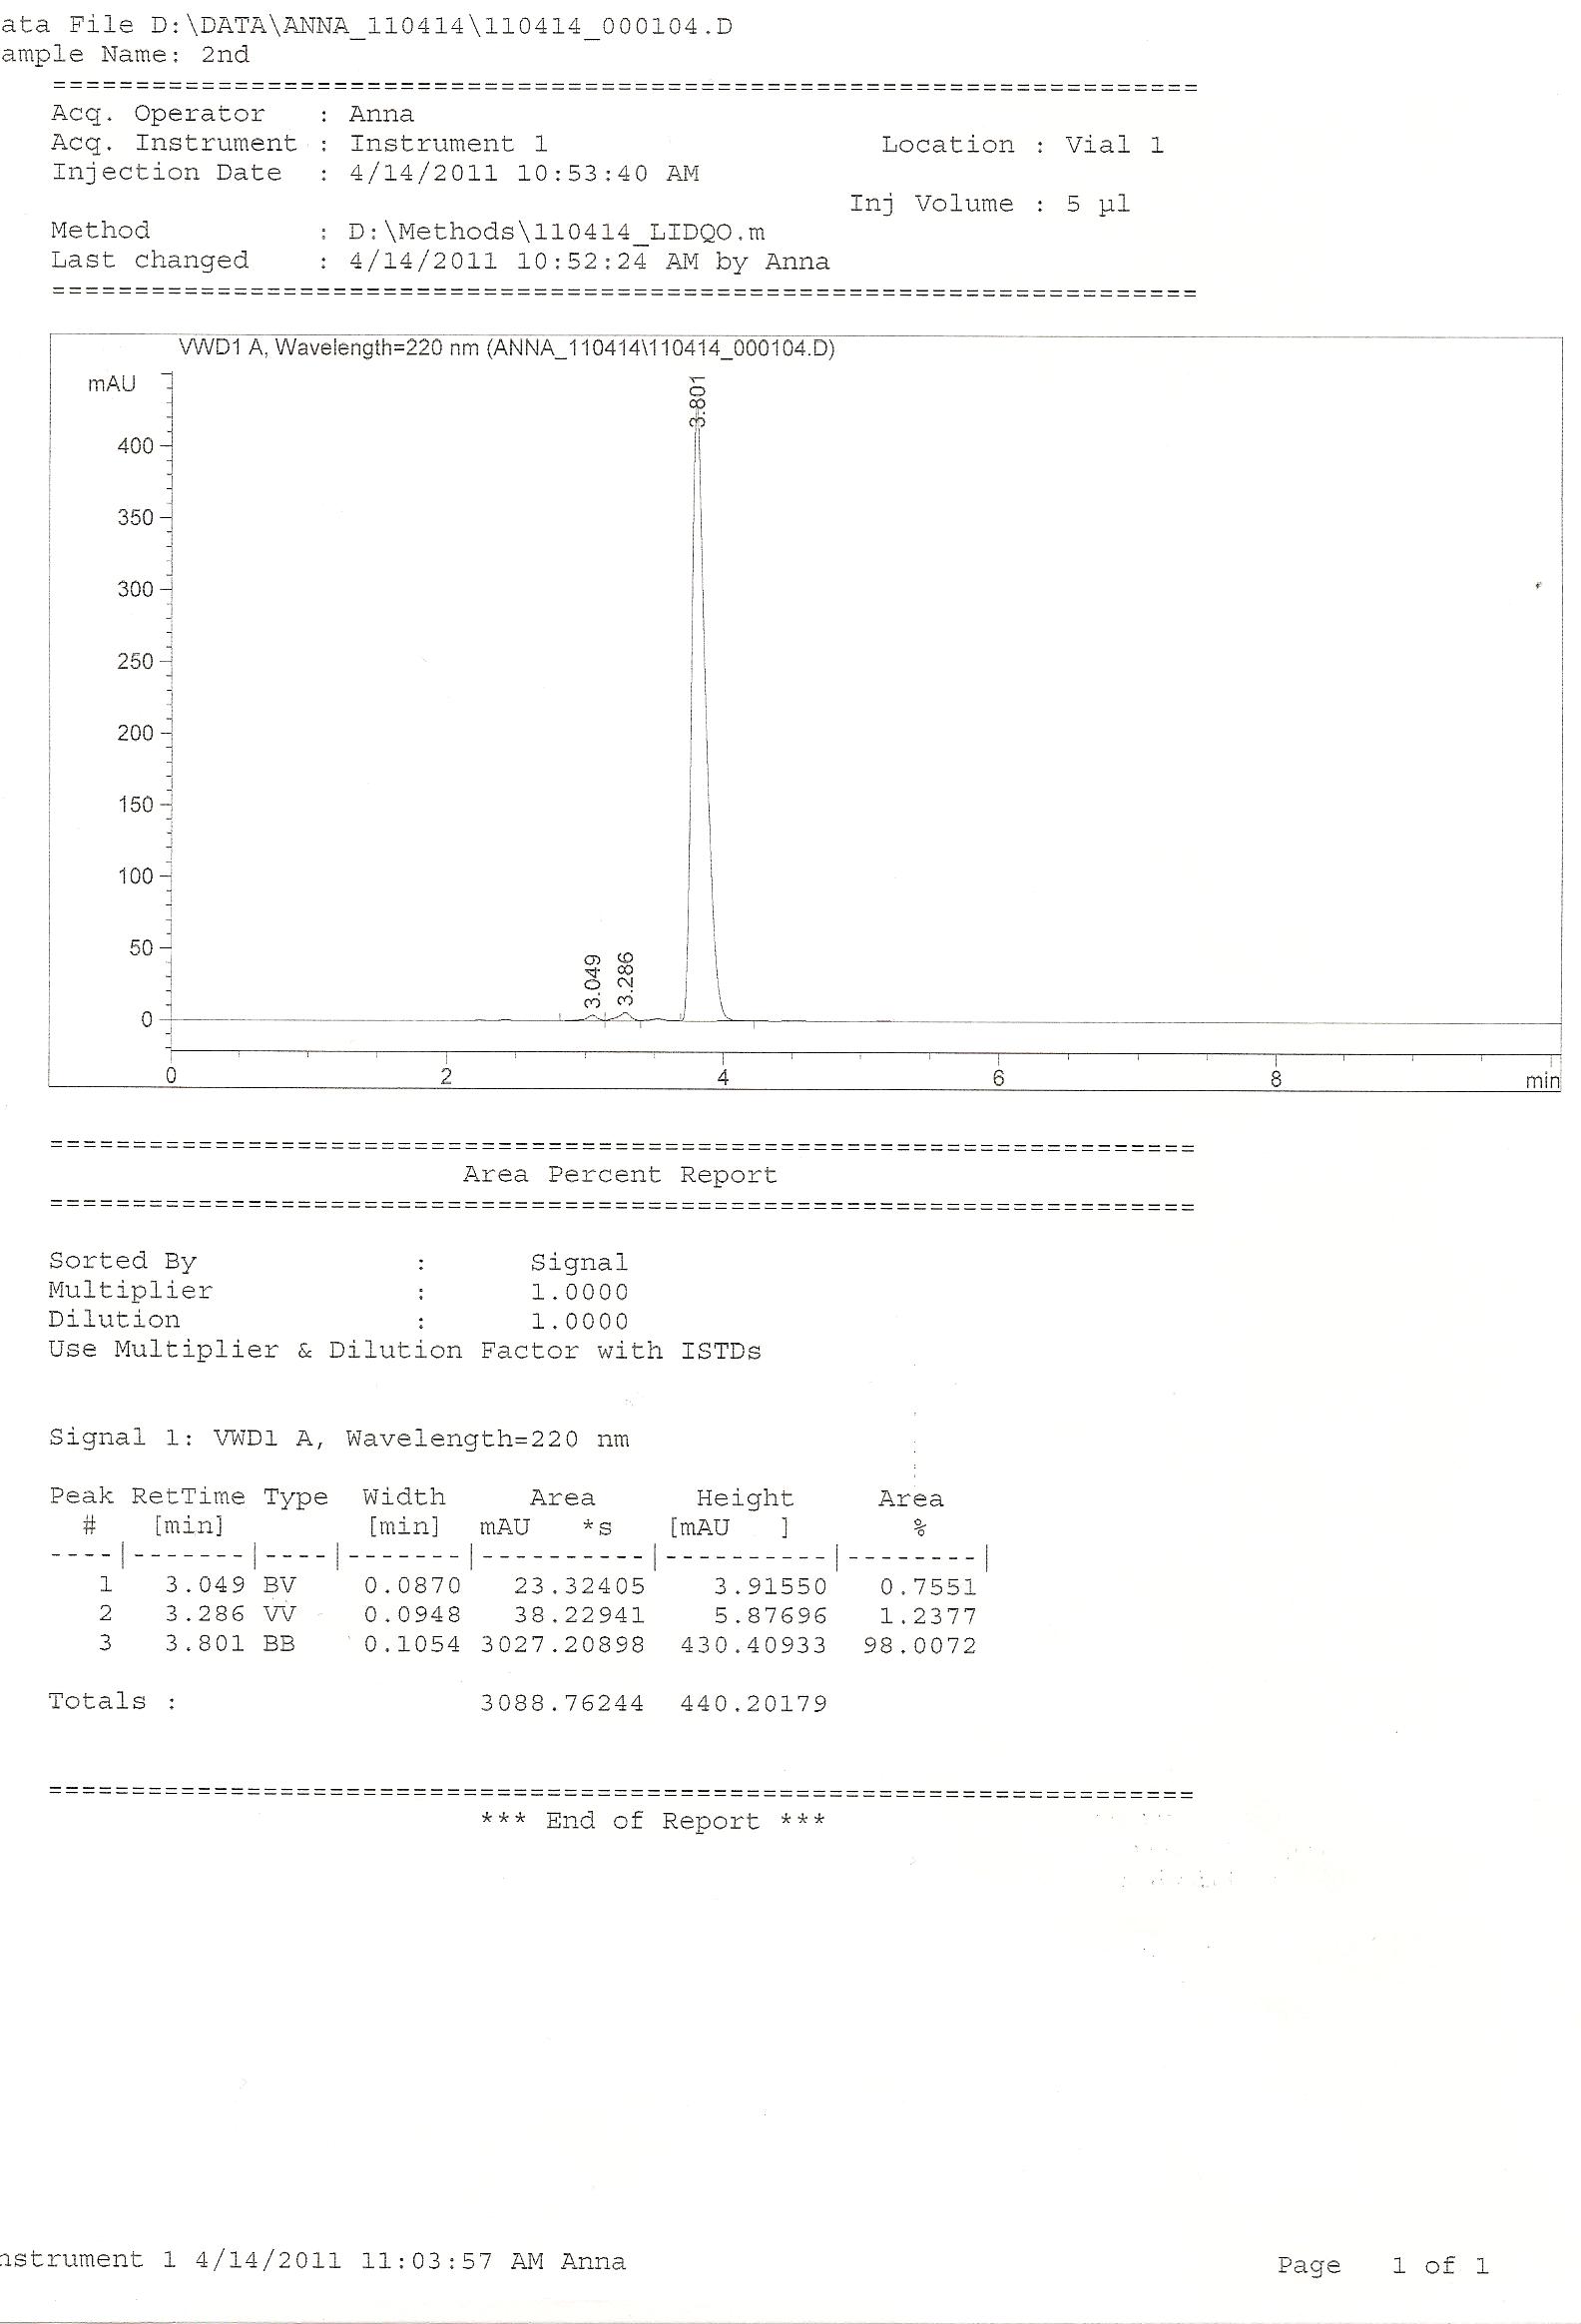


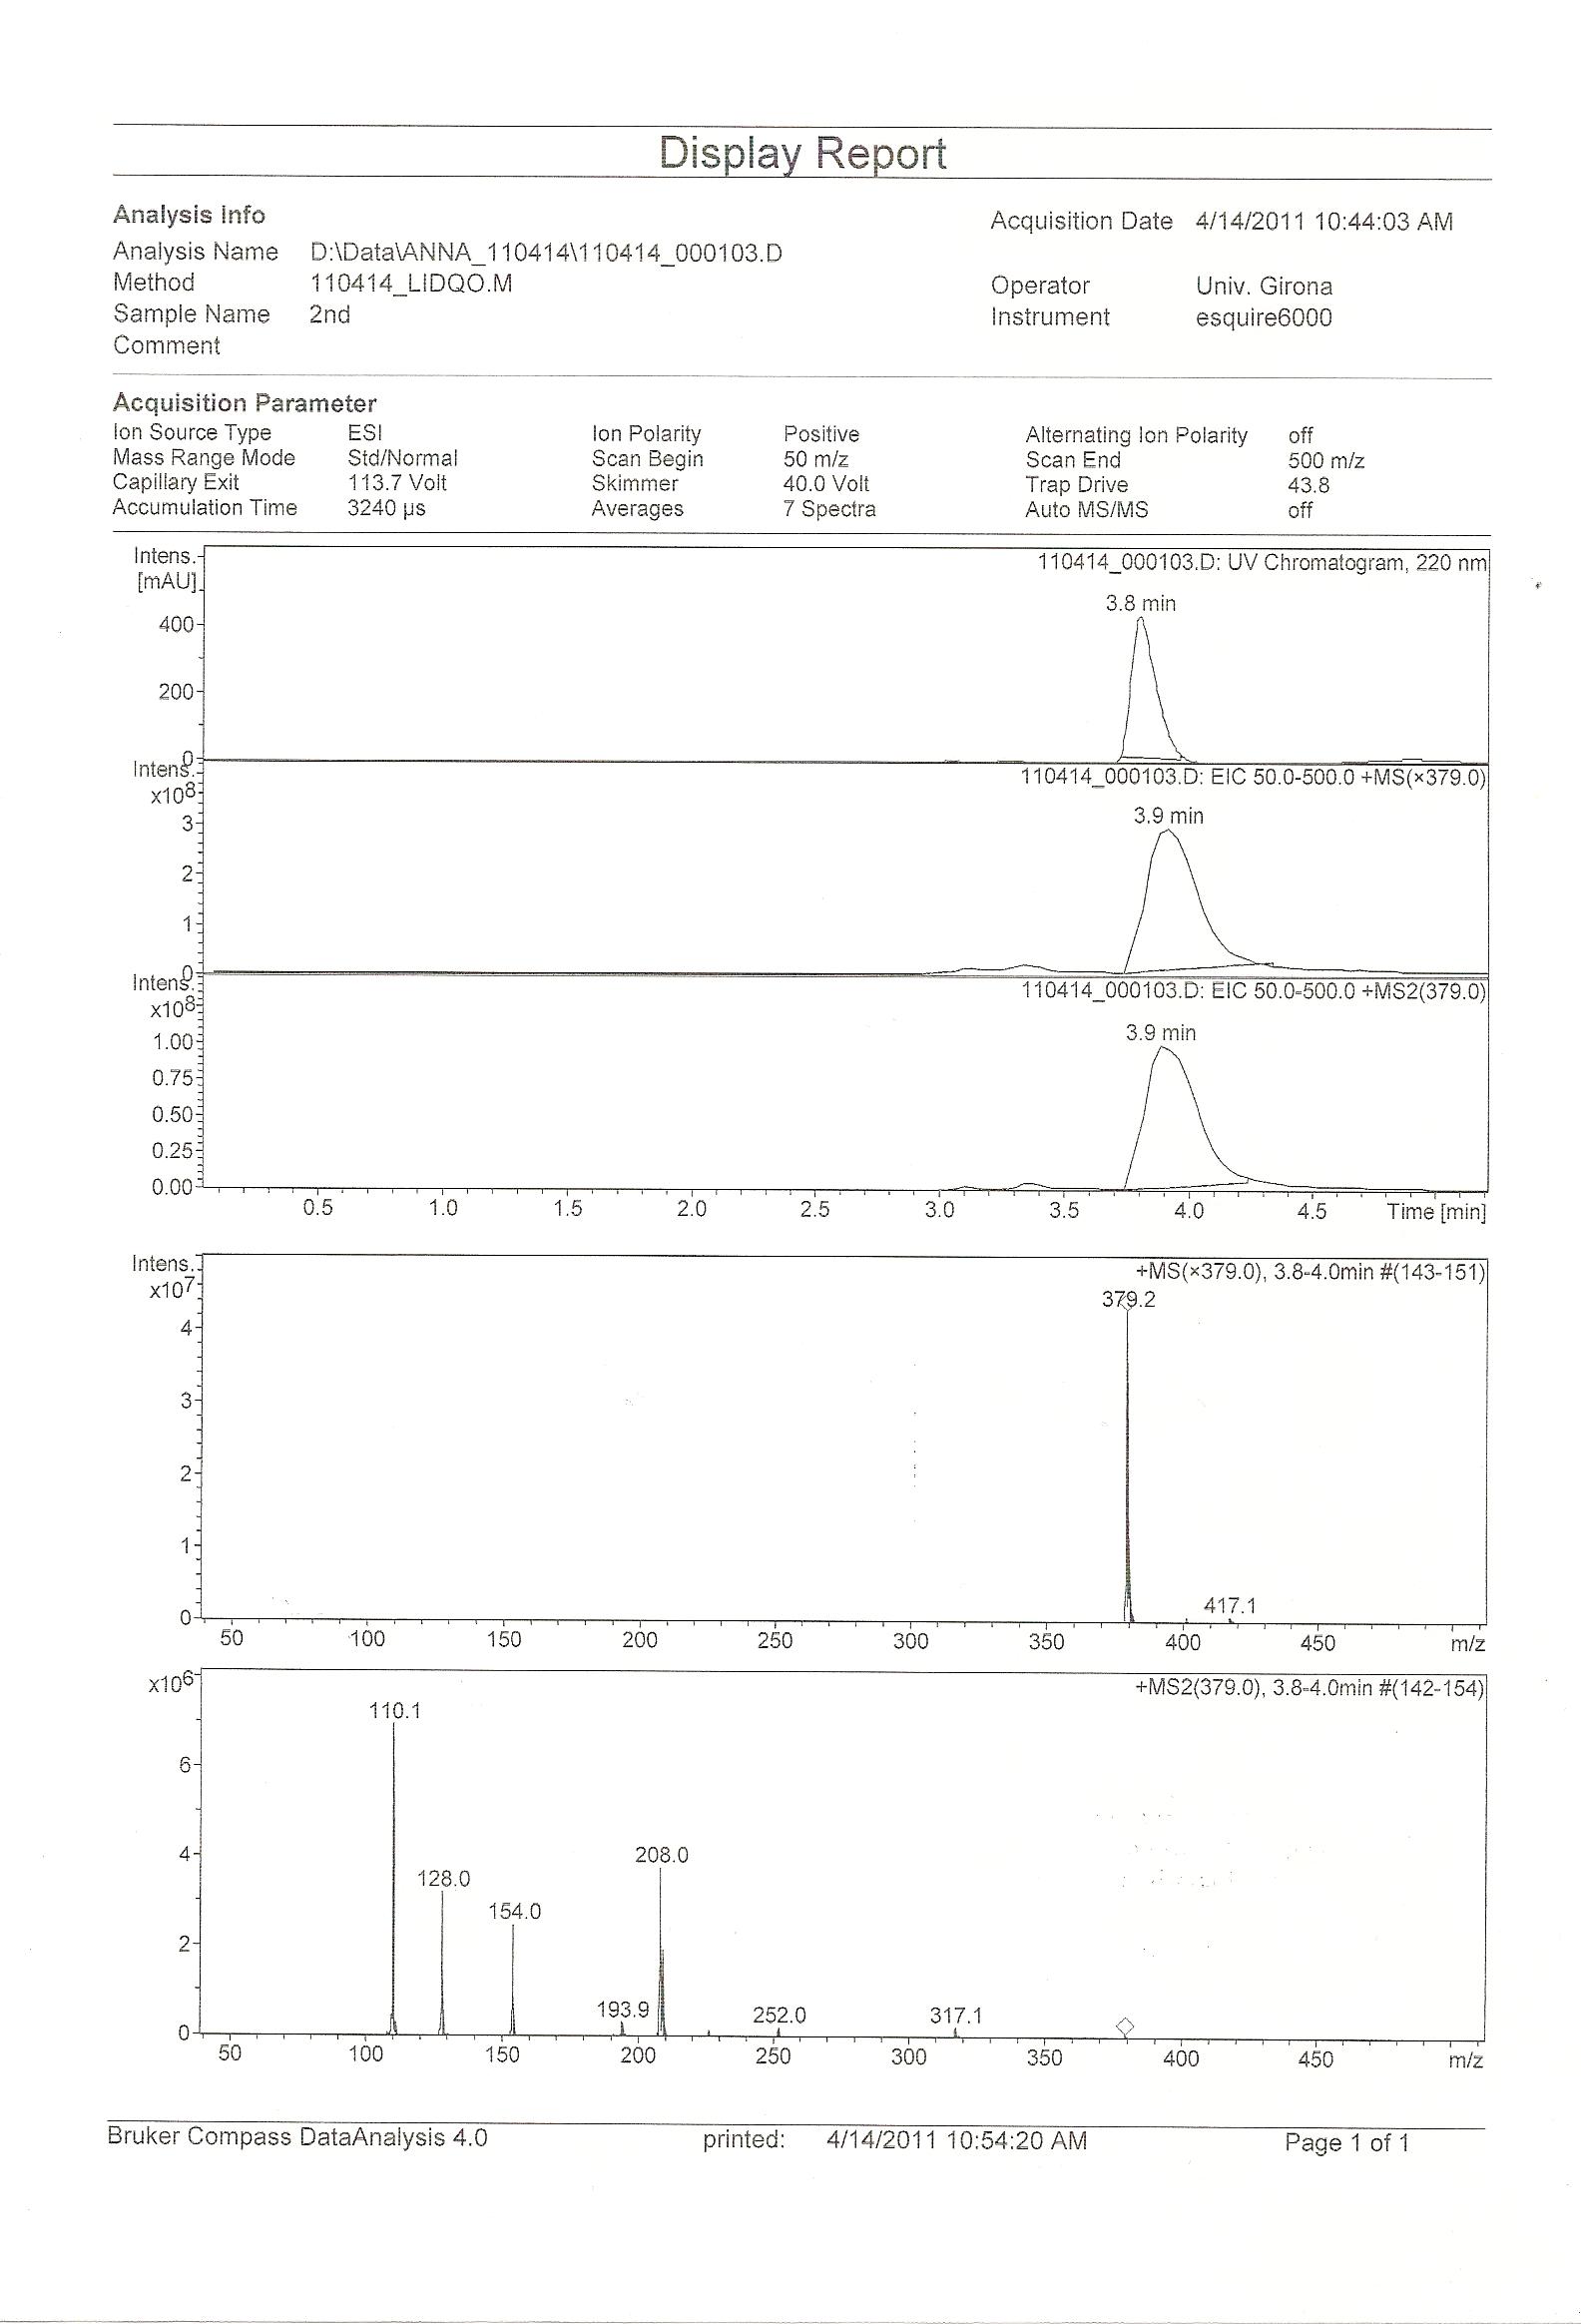

Supplement: Supplementary file 2 [file supplementary]
